# Supplementary material for: The evolution of reproductive strategies in turtles
Source: PeerJ journal article supplement (doi:10.7717/peerj.13014), 2022-03-11

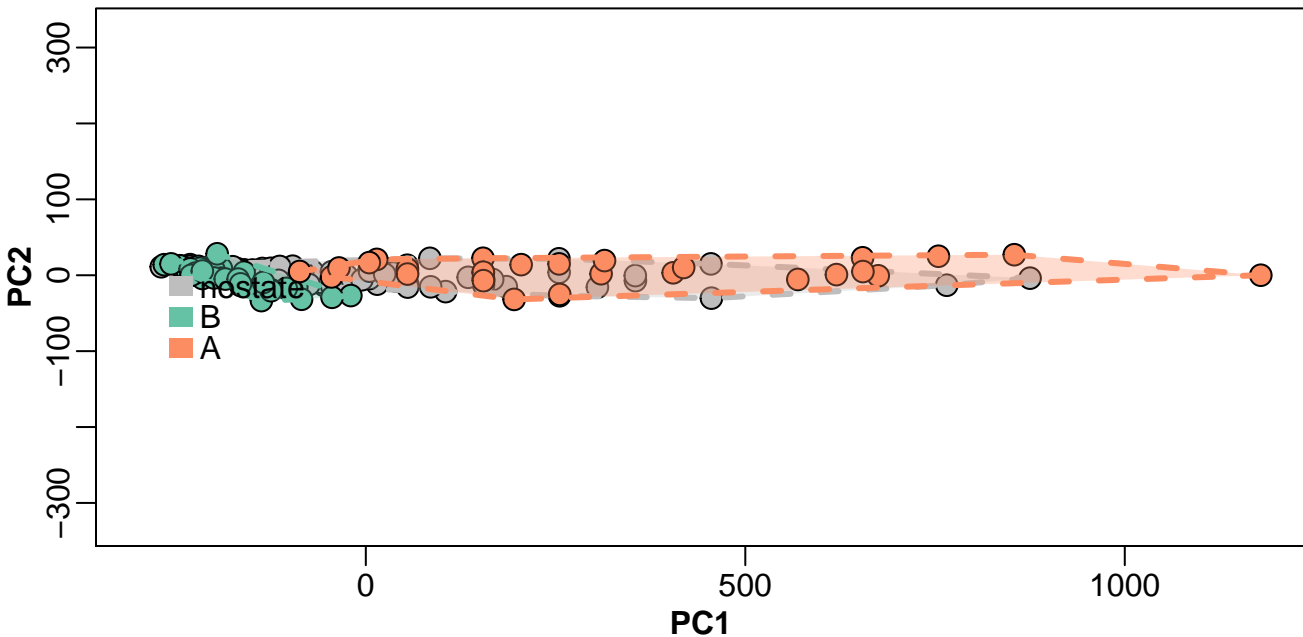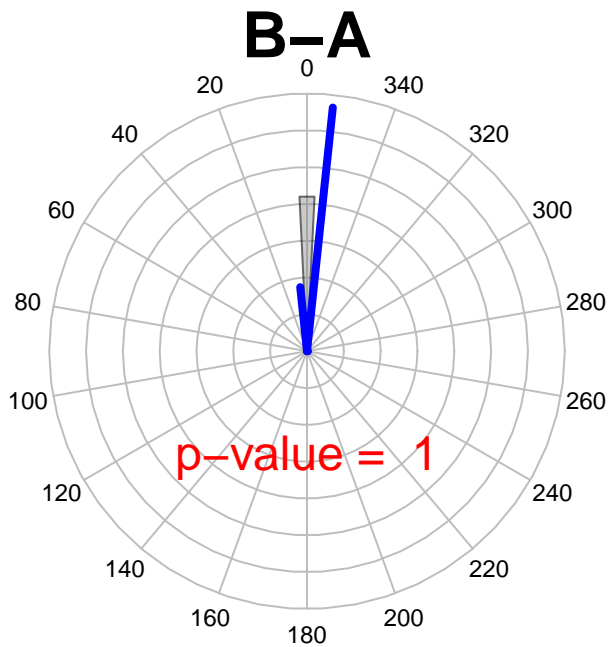

Supplement: Appendix_S5.pdf [file Appendix_S5.pdf]
