# Supplementary material for: The evolution of reproductive strategies in turtles
Source: PeerJ. 2022 Mar 11;10:e13014. doi: 10.7717/peerj.13014 (PMC8919852; doi:10.7717/peerj.13014)
Supplement: Supplemental Information 1 — Raw data, references and input data for analyses. [file peerj-10-13014-s001.xlsx]

## Sheet: Raw data
Species	Family	Latitude	Habitat	Carap.Lenght (female)	Plastron lenght	Pelvic aperture width	Egg Weight	Egg Width	Egg Lenght	Clutch min	Clutch max	Clutches/year	location	Source	Source2	Source3	Source4	Comment
Acanthochelys pallidipectoris	Chelidae	Tropical	Aquatic	175				23	26	2	5			Bonin et al. 2006. Turtles of the Wolrd.	Gheler-Costa, C., Lyra-Jorge, M.C. and Verdade, L.M. eds., 2016. Biodiversity in Agricultural Landscapes of Southeastern Brazil. Walter de Gruyter GmbH & Co KG.	.
Acanthochelys radiolata	Chelidae	Tropical	Aquatic	200			12		28	2	6			Gheler-Costa, C., Lyra-Jorge, M.C. and Verdade, L.M. eds., 2016. Biodiversity in Agricultural Landscapes of Southeastern Brazil. Walter de Gruyter GmbH & Co KG.	Highfield, 1996. Practical encyclopedia of keeping and breeding tortoises and freshwater turtles.Carapace Press. London.	Mocelin, M.A., Fernandes, R., Porto, M. and Fernandes, D.S., 2008. Reproductive biology and notes on natural history of the side-necked turtle Acanthochelys radiolata (Mikan, 1820) in captivity (Testudines: Chelidae). South American Journal of Herpetology, 3(3), pp.223-228.	.
Acanthochelys spixii	Chelidae	Tropical	Aquatic	170	165		8.5	25	27	1	9	1		Gheler-Costa, C., Lyra-Jorge, M.C. and Verdade, L.M. eds., 2016. Biodiversity in Agricultural Landscapes of Southeastern Brazil. Walter de Gruyter GmbH & Co KG.	Highfield, 1996. Practical encyclopedia of keeping and breeding tortoises and freshwater turtles.Carapace Press. London.	Bager et al. 2016. Morphology and sexual dimorphism of Acanthochelys spixii (Testudines, Chelidae) in Brazil.	Bujes, C.S., 2010. Os Testudines continentais do Rio Grande do Sul, Brasil: taxonomia, história natural e conservação. Iheringia. Série Zoologia, 100(4), pp.413-424.	https://www.icmbio.gov.br/portal/faunabrasileira/estado-de-conservacao/7405-repteis-acantochelys-spixii-cagado-de-espinhos
Acantochelys macrocephala	Chelidae	Tropical	Aquatic	295			20	28	30		1 to 8			Bonin et al. 2006. Turtles of the Wolrd.	Rueda-Almonacid et al. 2007. Las tortugas y los cocodrilianos de los países andinos del trópico. Conservacion internacional.	.
Chelodina canni	Chelidae	Tropical	Aquatic	248	204			22.2	33.8		1 to 10			McCord, W.P. and Thomson, S.A., 2002. A new species of Chelodina (Testudines: Pleurodira: Chelidae) from northern Australia. Journal of Herpetology, 36(2), pp.255-267.	.
Chelodina colliei	Chelidae	Tropical	Aquatic	275			12	23.5	36.7		9 to 16	2	Perth, WA	Kuchling, 1989. ASSESSMENT OF OVARIAN FOLLICLES AND OVIDUCTAL EGGS BY ULTRA-SOUND SCANNING IN LIVE FRESHWATER TURTLES, CHELODINA OBLONGA	Clay, 1981. Observations on the breeding biology and behaviour of the long-necked tortoise, Chelodina oblonga	.
Chelodina expansa	Chelidae	Temperate	Aquatic	480	260		18.9	25	37		5 to 30	1		Elgar, M. and Heaphy, L.J., 1989. Covariation between clutch size, egg weight and egg shape: comparative evidence for chelonians. Journal of Zoology, 219(1), pp.137-152.	Bonin et al. 2006. Turtles of the Wolrd.	Booth, 1998. Egg Size, Clutch Size, and Reproductive Effort of the Australian Broad-Shelled River Turtle, Chelodina expansa	Spencer, 2006. Growth patterns of two widely distributted freshwater turtles and comparison of common methods to estimate age.	Booth says there is a chance they can lay another clutch.
Chelodina longicollis	Chelidae	Temperate	Aquatic	178			8.0	20.6	37.1		6 to 23	3		Elgar, M. and Heaphy, L.J., 1989. Covariation between clutch size, egg weight and egg shape: comparative evidence for chelonians. Journal of Zoology, 219(1), pp.137-152.	Highfield, 1996. Practical encyclopedia of keeping and breeding tortoises and freshwater turtles.Carapace Press. London.	Kennett et al. 2009. Chellodina longicollis...	.	Bonin et al. 2006 says it lays between 8 and 24 eggs.
Chelodina mccordi	Chelidae	Tropical	Aquatic	232	174			21	30		7 to 16	maybe 2		Eisemberg et al. 2014. Assessment of Chelodina mccordi current status and community awareness along the Lake Iralalaro, Timor-Leste.	Rhodin, A.G.J., Ibarrondo, B.R. and Kuchling, G., 2008. Chelodina mccordi Rhodin 1994—Roti Island snake-necked turtle, McCord’s snake-necked turtle, kura-kura rote. Conservation Biology of Freshwater Turtle and Tortoises: A Compilation Project of the IUCN/SSC Tortoise and Freshwater Turtle Specialist Group. Chelonian Research Monographs, 5(1), pp.008-001.	.
Chelodina novaeguineae	Chelidae	Tropical	Aquatic	160	125			22	32		10 to 20			Elgar, M. and Heaphy, L.J., 1989. Covariation between clutch size, egg weight and egg shape: comparative evidence for chelonians. Journal of Zoology, 219(1), pp.137-152.	Bonin et al. 2006. Turtles of the Wolrd.	McCord, W.P. and Thomson, S.A., 2002. A new species of Chelodina (Testudines: Pleurodira: Chelidae) from northern Australia. Journal of Herpetology, 36(2), pp.255-267.	.
Chelodina reimanni	Chelidae	Tropical	Aquatic	217	168			19	28		8 to 12			Bonin et al. 2006. Turtles of the Wolrd.	McCord, W.P. and Thomson, S.A., 2002. A new species of Chelodina (Testudines: Pleurodira: Chelidae) from northern Australia. Journal of Herpetology, 36(2), pp.255-267.	.
Chelodina rugosa	Chelidae	Tropical	Aquatic	320	245		20	26	35		4 to 17	2 to 4		Georges et al. 2006. Freshwater turtles of the TransFly region of Papupa New Guinea - notes on diversity, distribution and reproduction.	Bonin et al. 2006. Turtles of the Wolrd.	Kennett, R., Fordham, D., Alacs, E., Corey, B. and Georges, A., 2014. Chelodina oblonga Gray 1841: Northern Snake-Necked Turtle. Chelonian Research Monographs, 5, pp.1-13.	.	Lays eggs underwater
Chelodina steindachneri	Chelidae	Temperate	Aquatic	180				18	30		7 to 8	1		Bonin et al. 2006. Turtles of the Wolrd.	.
Chelus fimbriata	Chelidae	Tropical	Aquatic	381				35	36		12 to 28	1		Elgar, M. and Heaphy, L.J., 1989. Covariation between clutch size, egg weight and egg shape: comparative evidence for chelonians. Journal of Zoology, 219(1), pp.137-152.	Highfield, 1996. Practical encyclopedia of keeping and breeding tortoises and freshwater turtles.Carapace Press. London.	Ferrara et al. 2017. Quelônios amanzônicos guia de identificação e distribuição. Wildlife conservation society. Manaus.	.
Elseya albagula	Chelidae	Tropical	Aquatic	400	330		27.9 to 37.1	34.4	57.5		10 to 16	1		Hamann et al. 2008. FRESHWATER TURTLE POPULATIONS IN THE BURNETT RIVER.	Eiby and Booth, 2011. Determining optimal incubation temperature for a head-start program: the effect of incubation temperature on hatchling Burnett River snapping turtles (Elseya albagula).	.
Elseya branderhorsti	Chelidae	Tropical	Aquatic	500	364		9.9	29.8	52.6		15 to 32	1 to 2		Bonin et al. 2006. Turtles of the Wolrd.	Georges et al. 2006. Freshwater turtles of the TransFly region of Papupa New Guinea - notes on diversity, distribution and reproduction.	.
Elseya dentata	Chelidae	Tropical	Aquatic	285	235		23	30	50		8 to 12	1 to 2		Bonin et al. 2006. Turtles of the Wolrd.	Thomson, S., Amepou, Y.O.L.A.R.N.I.E., Anamiato, J. and Georges, A., 2015. A new species and subgenus of Elseya (Testudines: Pleurodira: Chelidae) from New Guinea. Zootaxa, 4006(1), pp.59-82.	Kennett, R., 1994. Ecology of two species of freshwater turtle, Chelodina rugosa and Elseya dentata, from the wet-dry tropics of northern Australia (Doctoral dissertation, University of Queensland).	.	normally only one clutch a year
Elseya irwini	Chelidae	Tropical	Aquatic	325	263			35	45		around 12			Bonin et al. 2006. Turtles of the Wolrd.	Thomson, S., Amepou, Y.O.L.A.R.N.I.E., Anamiato, J. and Georges, A., 2015. A new species and subgenus of Elseya (Testudines: Pleurodira: Chelidae) from New Guinea. Zootaxa, 4006(1), pp.59-82.	.
Elseya lavarackorum	Chelidae	Tropical	Aquatic	255	200							6 to 9		Freeman et al. 2010. Saving a living fossil: identification and mitigation of threats to the conservation status of the freshwater turtle, Elseya lavarackorum.	Thomson, S., Amepou, Y.O.L.A.R.N.I.E., Anamiato, J. and Georges, A., 2015. A new species and subgenus of Elseya (Testudines: Pleurodira: Chelidae) from New Guinea. Zootaxa, 4006(1), pp.59-82.	.
Elseya novaguineae	Chelidae	Tropical	Aquatic	300	210			33	55		9 to 14			Bonin et al. 2006. Turtles of the Wolrd.	Georges et al. 2006. Freshwater turtles of the TransFly region of Papupa New Guinea - notes on diversity, distribution and reproduction.	.
Elusor macrurus	Chelidae	Temperate	Aquatic	378	305		10.35	25	35		10 to 16	1		Bonin et al. 2006. Turtles of the Wolrd.	Georges and McInnes, 1998. Temperature Fails to Influence Hatchling Sex in another Genus and Species of Chelid Turtle, Elusor macrurus	Cann and Legler, 1994. The Mary River Tortoise: A New Genus and Species ofShort-Necked Chelid from Queensland, Australia (Testudines: Pleurodira).	http://www.environment.gov.au/cgi-bin/sprat/public/publicspecies.pl?taxon_id=64389	.
Emydura macquarii	Chelidae	Temperate	Aquatic	310	270		10.60	23	33		18 to 33	1- 2 (usually 1)		Elgar, M. and Heaphy, L.J., 1989. Covariation between clutch size, egg weight and egg shape: comparative evidence for chelonians. Journal of Zoology, 219(1), pp.137-152.	Thompson, 1983. The physiology and ecology of the eggs of of the pleurodiran tortoise emydura macquarii (gray 1831). Honours thesis, zoology department. University of adelaide.	Booth et al. 2004. the influence of incubation temperature on post-hatching fitness characteristics of turtles. International congress series 1275 (226-233).	.	egg width is positively correlated with plastron size, what means that egg size might be constrained by pelvic aperture size. In this case: can I use maximum egg width values as pelvic aperture values in species where animal size and egg size are positively correlated? /////// 5 subspecies (binjing, dharra, dharuk, gunabarra and signata).
Emydura subglobosa	Chelidae	Tropical	Aquatic	260	179		7.8	20	40		4 to 11	several		Highfield, 1996. Practical encyclopedia of keeping and breeding tortoises and freshwater turtles.Carapace Press. London.	Georges et al. 2006. Freshwater turtles of the TransFly region of Papupa New Guinea - notes on diversity, distribution and reproduction.	.
Emydura tanybaraga	Chelidae	Tropical	Aquatic	167	143			26	32		17			Bonin et al. 2006. Turtles of the Wolrd.	Cann, J., 1997. The northern yellow-faced turtle. Monitor (Victorian Herpetological Society, Melbourne), 9(1), pp.24-29.	.
Emydura victoriae	Chelidae	Tropical	Aquatic	160	140		11.3	22	39		6 to 18	1 to 2		Bonin et al. 2006. Turtles of the Wolrd.	Gaikhorst, G.S., Clarke, B.R., McPharlin, M., Larkin, B., McLaughlin, J. and Mayes, J. (2011) The captive husbandry and reproduction of the pink-eared turtle (Emydura victoriae) at Perth Zoo. Zoo Biology, 30 (1). pp. 79-94.	.
Hydromedusa maximiliani	Chelidae	Tropical	Aquatic	177	132.5			25	45.4		1 to 3	1		Gheler-Costa, C., Lyra-Jorge, M.C. and Verdade, L.M. eds., 2016. Biodiversity in Agricultural Landscapes of Southeastern Brazil. Walter de Gruyter GmbH & Co KG.	Famelli et al. 2011. Structure of a Population of Hydromedusa maximiliani (Testudines, Chelidae) from Parque Estadual da Serra do Mar, an Atlantic Rainforest Preserve in Southeastern Brazil	Famelli et al. 2014 Reproductive Biology of the Freshwater Turtle Hydromedusa maximiliani (Chelidae) from Southeastern Brazil	.
Hydromedusa tectifera	Chelidae	Tropical	Aquatic	300	238		22.5	28	36		5 to 15	1		Highfield, 1996. Practical encyclopedia of keeping and breeding tortoises and freshwater turtles.Carapace Press. London.	Fagundes e Badger, 2007. Ecologia reprodutiva de Hydromedusa tecifera (Testudines: Chelidae) no sul do Brasil.	Chinen et al. 2004. BIOLOGIA REPRODUTIVA DE HYDROMEDUSA TECTIFERA EM CATIVEIRO (TESTUDINES, CHELIDAE)	David (person. Comm.)	.
Mesoclemmys dahli	Chelidae	Tropical	Aquatic	184	162		16.3	29	36		1 to 6	Several (6 is possible)		Elgar, M. and Heaphy, L.J., 1989. Covariation between clutch size, egg weight and egg shape: comparative evidence for chelonians. Journal of Zoology, 219(1), pp.137-152.	Bonin et al. 2006. Turtles of the Wolrd.	Forero-Medina et al. 2013. Mesoclemmys dahli (Zangerl and Medem 1958) – Dahl’s Toad-Headed Turtle, Carranchina, Tortuga Montañera. Conservation Biology of Freshwater Turtles and Tortoises • Chelonian Research Monographs, No. 5	Medem, 1966. CONTRIBUCIONES AL CONOCIMIENTO SOBRE LA ECOLOGIA Y DISTRIBUCION GEOGRAFICA DE PHRYNOPS (BATRACHEMYS) DAHLI; (TESTUDINATA, PLEURODIRA, CHELIDAE).	rueda-Almonacid et al. 2004 reported 12 eggs in one nest.
Mesoclemmys gibba	Chelidae	Tropical	Aquatic	230			25.5	32	45		1 to 5	1 to 2		Ferrara et al. 2017. Quelônios amanzônicos guia de identificação e distribuição. Wildlife conservation society. Manaus.	Elgar, M. and Heaphy, L.J., 1989. Covariation between clutch size, egg weight and egg shape: comparative evidence for chelonians. Journal of Zoology, 219(1), pp.137-152.	Metrailler, 2006. Keeping and breeding Mesoclemmys gibba.	Pieau & Dorizzi (2004	.
Mesoclemmys heliostemma	Chelidae	Tropical	Aquatic	300				41.4	50.8		2 to 11	2		Ferrara et al. 2017. Quelônios amanzônicos guia de identificação e distribuição. Wildlife conservation society. Manaus.	Moravec, J., 2017. First data on reproduction and hatchling morphology of Mesoclemmys heliostemma (MCCORD, JOSEPH-OUNI & LAMAR, 2001).	.
Mesoclemmys hogei	Chelidae	Tropical	Aquatic	350					31		6			Bonin et al. 2006. Turtles of the Wolrd.	Alvarenga, C.C.E.D., 2006. Aspectos da biologia reprodutiva de Rhinemys rufipes (Spix, 1824)(Chelidae, Testudines) na Reserva Florestal Adolpho Ducke, Amazonas, Brasil.	.
Mesoclemmys nasuta	Chelidae	Tropical	Aquatic	330					25		6 to 8			Ferrara et al. 2017. Quelônios amanzônicos guia de identificação e distribuição. Wildlife conservation society. Manaus.	.
Mesoclemmys raniceps	Chelidae	Tropical	Aquatic	370			26	30	40		4 to 6	up to 6		Ferrara et al. 2017. Quelônios amanzônicos guia de identificação e distribuição. Wildlife conservation society. Manaus.	Bohm, 2010. Ecology of the chelid turtles Platemys platycephala, Mesoclemmys gibba and Mesoclemmys nasuta in French Guyana. With notes on short term migrations and dietary spectrum of Platemys platycephala in the Nouragues Field Reserve, French Guyana.	.		bonin et l 2006 says it lays six to nine eggs.
Mesoclemmys tuberculata	Chelidae	Tropical	Aquatic	300			11.5	25	31		5 to 10			Bonin et al. 2006. Turtles of the Wolrd.	Santana et al. 2016. Mesoclemmys tuberculata (Luederwaldt 1926) – Tuberculate Toad-headed Turtle.	.
Mesoclemmys vanderhaegei	Chelidae	Tropical	Aquatic	262	200		14.5	28.5	35		3 to 14	1 or 2		Gheler-Costa, C., Lyra-Jorge, M.C. and Verdade, L.M. eds., 2016. Biodiversity in Agricultural Landscapes of Southeastern Brazil. Walter de Gruyter GmbH & Co KG.	Bonin et al. 2006. Turtles of the Wolrd.	Corazza e Molina, 2004. BIOLOGIA REPRODUTIVA E CONSERVAÇÃO EX-SITU DE BUFOCEPHALA VANDERHAEGEI (TESTUDINES, CHELIDAE)	Rueda-Almonacid et al. 2007. Las tortugas y los cocodrilianos de los países andinos del trópico. Conservacion internacional.	.
Mesoclemmys zuliae	Chelidae	Tropical	Aquatic	280				30.2	35.3		7 to 10			Pritchard and Trebbau, 1984. The turtles of Venezuela.	Rueda-Almonacid et al. 2007. Las tortugas y los cocodrilianos de los países andinos del trópico. Conservacion internacional.	.
Myuchelys bellii	Chelidae	Temperate	Aquatic	400			9.6	21	32		8 to 23	1		Bonin et al. 2006. Turtles of the Wolrd.	Fielder et al. 2010. Myuchelys bellii (Gray 1844) – Western Saw-shelled Turtle, Bell’s Turtle	.
Myuchelys georgesi	Chelidae	Temperate	Aquatic	220							around 12			Bonin et al. 2006. Turtles of the Wolrd.	.
Myuchelys latisternum	Chelidae	Tropical	Aquatic	280	232			23	30		9 to 17	Several		Bonin et al. 2006. Turtles of the Wolrd.	Hamann et al. 2008. FRESHWATER TURTLE POPULATIONS IN THE BURNETT RIVER.	.		Hamman says 1 clutch a year.
Myuchelys purvisi	Chelidae	Temperate	Aquatic					23	32		7 to 23			Bonin et al. 2006. Turtles of the Wolrd.	.
Phrynops geoffroanus	Chelidae	Tropical	Aquatic	350			19.17	32	34		10 to 28	1 to 4		Elgar, M. and Heaphy, L.J., 1989. Covariation between clutch size, egg weight and egg shape: comparative evidence for chelonians. Journal of Zoology, 219(1), pp.137-152.	Ferrara et al. 2017. Quelônios amanzônicos guia de identificação e distribuição. Wildlife conservation society. Manaus.	.
Phrynops hilarii	Chelidae	Tropical	Aquatic	400			21.8	37	37		08 to 32	2		Gheler-Costa, C., Lyra-Jorge, M.C. and Verdade, L.M. eds., 2016. Biodiversity in Agricultural Landscapes of Southeastern Brazil. Walter de Gruyter GmbH & Co KG.	Bonin et al. 2006. Turtles of the Wolrd.	Prieto et al. 2019. ChemiCal Composition of the eggs of the freshwater turtle PhrynoPs hilarii (Chelidae: testudines).	.
Phrynops tuberosus	Chelidae	Tropical	Aquatic	390				30	30		10 to 20	1 to 4		Ferrara et al. 2017. Quelônios amanzônicos guia de identificação e distribuição. Wildlife conservation society. Manaus.	.
Phrynops williamsi	Chelidae	Tropical	Aquatic	252	212			27	34		5 to 9			Bujes, C.S., 2010. Os Testudines continentais do Rio Grande do Sul, Brasil: taxonomia, história natural e conservação. Iheringia. Série Zoologia, 100(4), pp.413-424.	Rhodin and Mittermeier, 1983. Description of Phrynops williamsi, A new species of chelid turtle of the south american P. geoffroanus complex.	.
Platemys platycephala	Chelidae	Tropical	Aquatic	180	157		27	28	51		1	1		Elgar, M. and Heaphy, L.J., 1989. Covariation between clutch size, egg weight and egg shape: comparative evidence for chelonians. Journal of Zoology, 219(1), pp.137-152.	Highfield, 1996. Practical encyclopedia of keeping and breeding tortoises and freshwater turtles.Carapace Press. London.	Pritchard and Trebbau, 1984. The turtles of Venezuela.	Lovich and Ernest, 1989. Variation in the Plastral Formulae of Selected Turtles with Comments on Taxonomic Utility.	McBee et al. (1985) cite Barros et al. (1976) and Bull & Legler (1980) and state that P. platycephala does not have sex chromosomes, but Pieau & Dorizzi (2004) report GSD patterns during incubation
Pseudemydura umbrina	Chelidae	Temperate	Aquatic	130			8.60	20	35		4	1		Elgar, M. and Heaphy, L.J., 1989. Covariation between clutch size, egg weight and egg shape: comparative evidence for chelonians. Journal of Zoology, 219(1), pp.137-152.	.			Females dig their nests with front legs.
Rheodytes leukops	Chelidae	Tropical	Aquatic	249			7.50	21	30		13	4		Elgar, M. and Heaphy, L.J., 1989. Covariation between clutch size, egg weight and egg shape: comparative evidence for chelonians. Journal of Zoology, 219(1), pp.137-152.	.
Rhinemys rufipes	Chelidae	Tropical	Aquatic	270			35	38 to 42	41 to 47		3 to 12	2	Colômbia	Páez et al. 2012 V. Biología y conservación de las tortugas continentables de Colombia. Humbolt	Alvarenga, C.C.E.D., 2006. Aspectos da biologia reprodutiva de Rhinemys rufipes (Spix, 1824)(Chelidae, Testudines) na Reserva Florestal Adolpho Ducke, Amazonas, Brasil.	.
Erymnochelys madagascariensis	Podocnemididae	Tropical	Aquatic	480			22	29.95	47.1		6 to 29	1 to 3		Bonin et al. 2006. Turtles of the Wolrd.	Kuchiling and Garcia, Pelomedusidae turtles.	.		Several clutches/year but bienal cicle. They nest several times every two years.
Peltocephalus dumerilianus	Podocnemididae	Tropical	Aquatic	500			43	37	55		3 to 25	1 to 2		Ferrara et al. 2017. Quelônios amanzônicos guia de identificação e distribuição. Wildlife conservation society. Manaus.	.
Podocnemis erythrocephala	Podocnemididae	Tropical	Aquatic	320			23	25	43.5		2 to 18	up to 4		Ferrara et al. 2017. Quelônios amanzônicos guia de identificação e distribuição. Wildlife conservation society. Manaus.	Páez et al. 2012 V. Biología y conservación de las tortugas continentables de Colombia. Humbolt	.
Podocnemis expansa	Podocnemididae	Tropical	Aquatic	1000	49.5 to 66		32.60	39.36 to 41,48	42,98 to 44,58		84 to 126	1	colombia	Elgar, M. and Heaphy, L.J., 1989. Covariation between clutch size, egg weight and egg shape: comparative evidence for chelonians. Journal of Zoology, 219(1), pp.137-152.	Vanzolini, P.E., 2003. On clutch size and hatching success of the South American turtles Podocnemis expansa (Schweigger, 1812) and P. unifilis Troschel, 1848 (Testudines, Podocnemididae). Anais da Academia Brasileira de Ciências, 75(4), pp.415-430.	Ferrara et al. 2017. Quelônios amanzônicos guia de identificação e distribuição. Wildlife conservation society. Manaus.	.	clutch may have up to 150 eggs, but commonly only 90.
Podocnemis lewyana	Podocnemididae	Tropical	Aquatic	500			32	44	45		10 to 40	at least 2	Colômbia	Páez et al. 2012 V. Biología y conservación de las tortugas continentables de Colombia. Humbolt	.
Podocnemis sextuberculata	Podocnemididae	Tropical	Aquatic	300			19	27	44		6 to 39	1 to 3		Ferrara et al. 2017. Quelônios amanzônicos guia de identificação e distribuição. Wildlife conservation society. Manaus.	Páez et al. 2012 V. Biología y conservación de las tortugas continentables de Colombia. Humbolt	.
Podocnemis unifilis	Podocnemididae	Tropical	Aquatic	500			23.04	28	41		4 to 52	2		Elgar, M. and Heaphy, L.J., 1989. Covariation between clutch size, egg weight and egg shape: comparative evidence for chelonians. Journal of Zoology, 219(1), pp.137-152.	Highfield, 1996. Practical encyclopedia of keeping and breeding tortoises and freshwater turtles.Carapace Press. London.	Páez et al. 2012 V. Biología y conservación de las tortugas continentables de Colombia. Humbolt	.	Vanzolini 2003 says they can have up to 30 eggs in each clutch
Podocnemis vogli	Podocnemididae	Tropical	Aquatic	340			20	29	48		7 to 18	up to 4		Elgar, M. and Heaphy, L.J., 1989. Covariation between clutch size, egg weight and egg shape: comparative evidence for chelonians. Journal of Zoology, 219(1), pp.137-152.	Pritchard and Trebbau, 1984. The turtles of Venezuela.	.
Pelomedusa subrufa	Pelomedusidae	Tropical	Aquatic	170				22	38		12 to 15 (up to 42 - Bonin)	1		Elgar, M. and Heaphy, L.J., 1989. Covariation between clutch size, egg weight and egg shape: comparative evidence for chelonians. Journal of Zoology, 219(1), pp.137-152.	Ewert et al., 1994. Patterns of Temperature-Dependent Sex Determination in Turtles.	.
Pelusios adansonii	Pelomedusidae	Tropical	Aquatic	220				18	30		around 15			Bonin et al. 2006. Turtles of the Wolrd.	.
Pelusios bechuanicus	Pelomedusidae	Tropical	Aquatic	330				22	36		20 to 50			Bonin et al. 2006. Turtles of the Wolrd.	.
Pelusios carinatus	Pelomedusidae	Tropical	Aquatic	265							6 to 12			Bonin et al. 2006. Turtles of the Wolrd.	.
Pelusios castaneus	Pelomedusidae	Tropical	Aquatic	285				25	35		6 to 25			Highfield, 1996. Practical encyclopedia of keeping and breeding tortoises and freshwater turtles.Carapace Press. London.	Bonin et al. 2006. Turtles of the Wolrd.	.
Pelusios castanoides	Pelomedusidae	Tropical	Aquatic	220				22	32		5 to 25	1		Highfield, 1996. Practical encyclopedia of keeping and breeding tortoises and freshwater turtles.Carapace Press. London.	Bonin et al. 2006. Turtles of the Wolrd.	Kuchling and Garcia. Pelomedusidae turtles	.	2 subspecies (castanoides and intergularis) ///// Kaudern 1922: Dig nests with front legs
Pelusios gabonensis	Pelomedusidae	Tropical	Aquatic	330				25	35		around 12			Bonin et al. 2006. Turtles of the Wolrd.	.
Pelusios marani	Pelomedusidae	Tropical	Aquatic	275				21	45					Bonin et al. 2006. Turtles of the Wolrd.	.
Pelusios niger	Pelomedusidae	Tropical	Aquatic	280				24	48		6 to 10			Bonin et al. 2006. Turtles of the Wolrd.	.
Pelusios rhodesianus	Pelomedusidae	Tropical	Aquatic	250				22	35		10 to 15			Bonin et al. 2006. Turtles of the Wolrd.	.
Pelusios sinatus	Pelomedusidae	Tropical	Aquatic	485			11.3	25	43		7 to 25			Bonin et al. 2006. Turtles of the Wolrd.	Morlock, 1978. Trutles perspectives and research.	.
Pelusios subniger	Pelomedusidae	Tropical	Aquatic	290			9.78	21	36		up to 13			Elgar, M. and Heaphy, L.J., 1989. Covariation between clutch size, egg weight and egg shape: comparative evidence for chelonians. Journal of Zoology, 219(1), pp.137-152.	.
Actinemys marmorata	Emydidae	Temperate	Aquatic	210			11.1	23	43		1 to 13	up to 2		Legler and Vogt, 2013. The tuertles of Mexico, land and freshwater forms. University of Claifornia press. California.	.			May skip na year without breeding ///// 2 subspicies (marmorata and pallida)
Chrysemys picta	Emydidae	Temperate	Aquatic	125	113-146	5.052 + 0.107 PL	4.69	16	30		4	4	Livingston County, Michigan	Elgar, M. and Heaphy, L.J., 1989. Covariation between clutch size, egg weight and egg shape: comparative evidence for chelonians. Journal of Zoology, 219(1), pp.137-152.	Congdon, J.D. and Gibbons, J.W., 1987. Morphological constraint on egg size: a challenge to optimal egg size theory?. Proceedings of the National Academy of Sciences, 84(12), pp.4145-4147.	Booth, 2006. Influence of Incubation Temperature on Hatchling Phenotype in Reptiles.	Janzen, F.J. and Warner, D.A., 2009. Parent–offspring conflict and selection on egg size in turtles. Journal of evolutionary biology, 22(11), pp.2222-2230. ////// Rowe, J.W., 1994. Reproductive variation and the egg size-clutch size trade-off within and among populations of painted turtles (Chrysemys picta bellii). Oecologia, 99(1-2), pp.35-44.	3 subspecies. Forsman and Shine (1995) report less than 1 cluch/year
Clemmys guttata	Emydidae	Temperate	Aquatic	102			6.25	16	29		2 to 4	1	Pennsylvania	Elgar, M. and Heaphy, L.J., 1989. Covariation between clutch size, egg weight and egg shape: comparative evidence for chelonians. Journal of Zoology, 219(1), pp.137-152.	Forsman, A. and Shine, R., 1995. Sexual size dimorphism in relation to frequency of reproduction in turtles (Testudines: Emydidae). Copeia, 1995(3), pp.727-729.	Highfield, 1996. Practical encyclopedia of keeping and breeding tortoises and freshwater turtles.Carapace Press. London.	.	Bonin says maximum 8 eggs and 2 clutches (32X17)
Clemmys insculpta	Emydidae	Temperate	Aquatic	185	181		9.80	23	33		4 to 8	1	Algonquin Provincial Park, Ontario	Elgar, M. and Heaphy, L.J., 1989. Covariation between clutch size, egg weight and egg shape: comparative evidence for chelonians. Journal of Zoology, 219(1), pp.137-152.	Brooks, R.J., Shilton, C.M., Brown, G.P. and Quinn, N.W., 1992. Body size, age distribution, and reproduction in a northern population of wood turtles (Clemmys insculpta). Canadian Journal of zoology, 70(3), pp.462-469.	Highfield, 1996. Practical encyclopedia of keeping and breeding tortoises and freshwater turtles.Carapace Press. London.	.	Bonin says 4 to 18 eggs (40X26)
Clemmys muhlenbergii	Emydidae	Temperate	Aquatic	76			4.66	15	30		2 to 6	1		Elgar, M. and Heaphy, L.J., 1989. Covariation between clutch size, egg weight and egg shape: comparative evidence for chelonians. Journal of Zoology, 219(1), pp.137-152.	Highfield, 1996. Practical encyclopedia of keeping and breeding tortoises and freshwater turtles.Carapace Press. London.	.
Deirochelys reticularia	Emydidae	Temperate	Aquatic	150	135-180	3.84 +0.12 PL	9.05	23	37		8	3	Aiken and Barnwell Counties, South Carolina	Elgar, M. and Heaphy, L.J., 1989. Covariation between clutch size, egg weight and egg shape: comparative evidence for chelonians. Journal of Zoology, 219(1), pp.137-152.	Congdon, J.D. and Gibbons, J.W., 1987. Morphological constraint on egg size: a challenge to optimal egg size theory?. Proceedings of the National Academy of Sciences, 84(12), pp.4145-4147.	.
Emydoidea blandingii	Emydidae	Temperate	Aquatic	190			13.59	24	39		3 to 19 (mean 10.2)	up to 3	southeastern Michigan	Elgar, M. and Heaphy, L.J., 1989. Covariation between clutch size, egg weight and egg shape: comparative evidence for chelonians. Journal of Zoology, 219(1), pp.137-152.	Congdon, J.D. and Loben Sels, R.C.V., 1991. Growth and body size in Blanding's turtles (Emydoidea blandingi): relationships to reproduction. Canadian Journal of Zoology, 69(1), pp.239-245.	Bonin et al. 2006. Turtles of the Wolrd.	Vogt e Bull, 1982. Temperature controlled sex determination in turtles: ecological and behavioral aspects.	Forsman and Shine (1995) report 0.5 clutches/year in Michigan.
Emys orbicularis	Emydidae	Temperate	Aquatic	140	122		6.00	17	30		10	1	south-west of Pisa, Italy	Elgar, M. and Heaphy, L.J., 1989. Covariation between clutch size, egg weight and egg shape: comparative evidence for chelonians. Journal of Zoology, 219(1), pp.137-152.	Zuffi, M.A.L., Odetti, F. and Meozzi, P., 1999. Body size and clutch size in the European pond turtle (Emys orbicularis) from central Italy. Journal of Zoology, 247(2), pp.139-143.	Vogt e Bull, 1982. Temperature controlled sex determination in turtles: ecological and behavioral aspects.	.	several subspecies
Graptemys barbouri	Emydidae	Temperate	Aquatic	270			13.93	26	36		7 to 11	2		Elgar, M. and Heaphy, L.J., 1989. Covariation between clutch size, egg weight and egg shape: comparative evidence for chelonians. Journal of Zoology, 219(1), pp.137-152.	Bonin et al. 2006. Turtles of the Wolrd.	Vogt e Bull, 1982. Temperature controlled sex determination in turtles: ecological and behavioral aspects.	.	up to 4 clutches: Morlock, 1978. Trutles perspectives and research.
Graptemys caglei	Emydidae	Temperate	Aquatic	210							1 to 6	2		Bonin et al. 2006. Turtles of the Wolrd.	Vogt e Bull, 1982. Temperature controlled sex determination in turtles: ecological and behavioral aspects.	.
Graptemys ernsti	Emydidae	Temperate	Aquatic	280								6		Bonin et al. 2006. Turtles of the Wolrd.	Vogt e Bull, 1982. Temperature controlled sex determination in turtles: ecological and behavioral aspects.	.
Graptemys geographica	Emydidae	Temperate	Aquatic		230		11.92	22	33		9 to 20	3		Elgar, M. and Heaphy, L.J., 1989. Covariation between clutch size, egg weight and egg shape: comparative evidence for chelonians. Journal of Zoology, 219(1), pp.137-152.	Bonin et al. 2006. Turtles of the Wolrd.	Vogt e Bull, 1982. Temperature controlled sex determination in turtles: ecological and behavioral aspects.	Ryan and Lindeman, 2007. Reproductive Allometry in the Common Map Turtle, Graptemys geographica.	.
Graptemys nigrinoda	Emydidae	Temperate	Aquatic	120							around 5	3		Bonin et al. 2006. Turtles of the Wolrd.	Vogt e Bull, 1982. Temperature controlled sex determination in turtles: ecological and behavioral aspects.	.
Graptemys oculifera	Emydidae	Tropical	Aquatic	180			11.86	20	41		2 or 3			Elgar, M. and Heaphy, L.J., 1989. Covariation between clutch size, egg weight and egg shape: comparative evidence for chelonians. Journal of Zoology, 219(1), pp.137-152.	Bonin et al. 2006. Turtles of the Wolrd.	Vogt e Bull, 1982. Temperature controlled sex determination in turtles: ecological and behavioral aspects.	.
Graptemys ouachitensis	Emydidae	Temperate	Aquatic	240				25	32		around 12	2 or 3	Wisconsin	Forsman, A. and Shine, R., 1995. Sexual size dimorphism in relation to frequency of reproduction in turtles (Testudines: Emydidae). Copeia, 1995(3), pp.727-729.	Bonin et al. 2006. Turtles of the Wolrd.	Vogt e Bull, 1982. Temperature controlled sex determination in turtles: ecological and behavioral aspects.	.
Graptemys pseudogeographica	Emydidae	Temperate	Aquatic	205			10.22	22	35		9	3		Elgar, M. and Heaphy, L.J., 1989. Covariation between clutch size, egg weight and egg shape: comparative evidence for chelonians. Journal of Zoology, 219(1), pp.137-152.	Vogt e Bull, 1982. Temperature controlled sex determination in turtles: ecological and behavioral aspects.	.		Forsman and Shine (1995) report 2 clutches/year in Wisconsin.
Graptemys pulchra	Emydidae	Temperate	Aquatic	270	235		10.83	32	42		4 to 6	5		Bonin et al. 2006. Turtles of the Wolrd.	Vogt e Bull, 1982. Temperature controlled sex determination in turtles: ecological and behavioral aspects.	Lovich and Ernest, 1989. Variation in the Plastral Formulae of Selected Turtles with Comments on Taxonomic Utility.	Elgar, M. and Heaphy, L.J., 1989. Covariation between clutch size, egg weight and egg shape: comparative evidence for chelonians. Journal of Zoology, 219(1), pp.137-152.	up to 6 clutches: Morlock, 1978. Trutles perspectives and research.
Malaclemys terrapin	Emydidae	Temperate	Aquatic	238	177	34.9	7.70	26	42		4 to 18	5		Elgar, M. and Heaphy, L.J., 1989. Covariation between clutch size, egg weight and egg shape: comparative evidence for chelonians. Journal of Zoology, 219(1), pp.137-152.	Highfield, 1996. Practical encyclopedia of keeping and breeding tortoises and freshwater turtles.Carapace Press. London.	Morlock, 1978. Trutles perspectives and research.	Booth, 2006	Kern et al. 2015. Relationships of maternal body size and morphology with egg and clutch size in the diamondback terrapin, Malaclemys terrapin (Testudines: Emydidae)
Pseudemys alabamensis	Emydidae	Temperate	Aquatic	330							Around 20	Several		Bonin et al. 2006. Turtles of the Wolrd.	Vogt e Bull, 1982. Temperature controlled sex determination in turtles: ecological and behavioral aspects.	.
Pseudemys concinna	Emydidae	Temperate	Aquatic	300	281		17.52	27	42		18	Several		Elgar, M. and Heaphy, L.J., 1989. Covariation between clutch size, egg weight and egg shape: comparative evidence for chelonians. Journal of Zoology, 219(1), pp.137-152.	Legler and Vogt, 2013. The tuertles of Mexico, land and freshwater forms. University of Claifornia press. California.	Congdon and Gibbons, 1985. Egg Components and Reproductive Characteristics of Turtles: Relationships to Body Size.	Bonin et al. 2006. Turtles of the Wolrd.	.
Pseudemys floridana	Emydidae	Temperate	Aquatic	290	180-280		11.64	25	36		18	4	South Carolina, USA	Elgar, M. and Heaphy, L.J., 1989. Covariation between clutch size, egg weight and egg shape: comparative evidence for chelonians. Journal of Zoology, 219(1), pp.137-152.	Gibbons, J.W., Greene, J.L. and Patterson, K.K., 1982. Variation in reproductive characteristics of aquatic turtles. Copeia, pp.776-784.	Forsman, A. and Shine, R., 1995. Sexual size dimorphism in relation to frequency of reproduction in turtles (Testudines: Emydidae). Copeia, 1995(3), pp.727-729.	Vogt e Bull, 1982. Temperature controlled sex determination in turtles: ecological and behavioral aspects.	.
Pseudemys gorzugi	Emydidae	Tropical	Aquatic	372				31	42					Vogt e Bull, 1982. Temperature controlled sex determination in turtles: ecological and behavioral aspects.	.
Pseudemys nelsoni	Emydidae	Temperate	Aquatic					26	38		12			Iverson, J.B., 1977. Reproduction in freshwater and terrestrial turtles of north Florida. Herpetologica, pp.205-212.	Vogt e Bull, 1982. Temperature controlled sex determination in turtles: ecological and behavioral aspects.	.
Pseudemys rubiventris	Emydidae	Temperate	Aquatic	400				24	37		6 to 25	2	Massachusetts	Forsman, A. and Shine, R., 1995. Sexual size dimorphism in relation to frequency of reproduction in turtles (Testudines: Emydidae). Copeia, 1995(3), pp.727-729.	Bonin et al. 2006. Turtles of the Wolrd.	Vogt e Bull, 1982. Temperature controlled sex determination in turtles: ecological and behavioral aspects.	.
Pseudemys texana	Emydidae	Temperate	Aquatic	330				26	35		10 to 12			Bonin et al. 2006. Turtles of the Wolrd.	Vogt e Bull, 1982. Temperature controlled sex determination in turtles: ecological and behavioral aspects.	.
Terrapene carolina	Emydidae	Temperate	Terrestrial	114	129		10.57	22	38		3 to 5	4		Elgar, M. and Heaphy, L.J., 1989. Covariation between clutch size, egg weight and egg shape: comparative evidence for chelonians. Journal of Zoology, 219(1), pp.137-152.	Highfield, 1996. Practical encyclopedia of keeping and breeding tortoises and freshwater turtles.Carapace Press. London.	Congdon and Gibbons, 1985. Egg Components and Reproductive Characteristics of Turtles: Relationships to Body Size.	Dodd, C.K., 1997. Clutch size and frequency in Florida box turtles (Terrapene carolina bauri): implications for conservation. Chelonian Conservation and Biology, 2, pp.370-377.	Four subspecies. Big variation
Terrapene coahuila	Emydidae	Temperate	Aquatic	120			6.81	17	33		2 to 4	up to 3		Elgar, M. and Heaphy, L.J., 1989. Covariation between clutch size, egg weight and egg shape: comparative evidence for chelonians. Journal of Zoology, 219(1), pp.137-152.	Highfield, 1996. Practical encyclopedia of keeping and breeding tortoises and freshwater turtles.Carapace Press. London.	Legler and Vogt, 2013. The tuertles of Mexico, land and freshwater forms. University of Claifornia press. California.	.
Terrapene nelsoni	Emydidae	Tropical	Terrestrial	145			19.6	27	42		1 to 4	1		Elgar, M. and Heaphy, L.J., 1989. Covariation between clutch size, egg weight and egg shape: comparative evidence for chelonians. Journal of Zoology, 219(1), pp.137-152.	Highfield, 1996. Practical encyclopedia of keeping and breeding tortoises and freshwater turtles.Carapace Press. London.	.
Terrapene ornata	Emydidae	Temperate	Terrestrial	146		24.1	10.77	23	31		2 to 6	1 or 2		Elgar, M. and Heaphy, L.J., 1989. Covariation between clutch size, egg weight and egg shape: comparative evidence for chelonians. Journal of Zoology, 219(1), pp.137-152.	Highfield, 1996. Practical encyclopedia of keeping and breeding tortoises and freshwater turtles.Carapace Press. London.	Bonin et al. 2006. Turtles of the Wolrd.	Long and Rose, 1989. Pelvic Girdle Size Relationships in Three Turtle Species.	Forsman and Shine (1995) report 1.3 clutches/year in Kansas. Legler e Vogt 2013 report that in new mexico females can skip 1 or 2 seasons without breeding, and around 57% of population breed each yaer.
Terrapene yucatana	Emydidae	Tropical	Terrestrial	155				28.1	50.4		2 to 3	up to 2		Legler and Vogt, 2013. The tuertles of Mexico, land and freshwater forms. University of Claifornia press. California.	Vogt e Bull, 1982. Temperature controlled sex determination in turtles: ecological and behavioral aspects.	.		females might skip one year of reproduction
Trachemys adiutrix	Emydidae	Tropical	Aquatic	250							10 to 12	2		Bonin et al. 2006. Turtles of the Wolrd.	tartarugas avph	.
Trachemys callirostris	Emydidae	Tropical	Aquatic	350				18 to 26	30 to 45		3 to 25	bimodal/several	Colômbia	Páez et al. 2012 V. Biología y conservación de las tortugas continentables de Colombia. Humbolt	.
Trachemys decorata	Emydidae	Tropical	Aquatic	300					40		6 to 18	4		Bonin et al. 2006. Turtles of the Wolrd.	.
Trachemys decussata	Emydidae	Tropical	Aquatic	390				25.5	40.5					Bonin et al. 2006. Turtles of the Wolrd.	.
Trachemys dorbigni	Emydidae	Tropical	Aquatic	260			16	26	40.7		6 to 19	3		Bonin et al. 2006. Turtles of the Wolrd.	Badger et al. 2007. NESTING ECOLOGY OF A POPULATION OF TRACHEMYS DORBIGNYI (EMYDIDAE) IN SOUTHERN BRAZIL. Herpetologica.	.
Trachemys scripta	Emydidae	Tropical	Aquatic	210	148-278	8.316 + 0.096 PL	10.80	26	39		6 to 18	2	Aiken and Barnwell Counties, South Carolina	Elgar, M. and Heaphy, L.J., 1989. Covariation between clutch size, egg weight and egg shape: comparative evidence for chelonians. Journal of Zoology, 219(1), pp.137-152.	Congdon, J.D. and Gibbons, J.W., 1987. Morphological constraint on egg size: a challenge to optimal egg size theory?. Proceedings of the National Academy of Sciences, 84(12), pp.4145-4147.	Gibbons, 1990. Life history and ecology of the slider turtle. Smithsonian institution press.	.	3 subspecies. Forsman and Shine (1995) report 3,5 clhutches/ year in South Carolina and Panama
Trachemys stejnegeri	Emydidae	Tropical	Aquatic	240				26	43		3 to 14	3		Bonin et al. 2006. Turtles of the Wolrd.	.
Trachemys venusta	Emydidae	Tropical	Aquatic	500				34	47		12 to 32	up to 6	Colômbia	Páez et al. 2012 V. Biología y conservación de las tortugas continentables de Colombia. Humbolt	.
Batagur baska	Geoemydidae	Tropical	Aquatic	540				40	76		15 to 35	3		Elgar, M. and Heaphy, L.J., 1989. Covariation between clutch size, egg weight and egg shape: comparative evidence for chelonians. Journal of Zoology, 219(1), pp.137-152.	Bonin et al. 2006. Turtles of the Wolrd.	.
Batagur borneoensis	Geoemydidae	Tropical	Aquatic	600				40	72		15 to 25	3		Bonin et al. 2006. Turtles of the Wolrd.	.
Batagur dhongoka	Geoemydidae	Tropical	Aquatic	480				36	57		20 to 35			Bonin et al. 2006. Turtles of the Wolrd.	.
Batagur kachuga	Geoemydidae	Tropical	Aquatic	560				45	68		25			Bonin et al. 2006. Turtles of the Wolrd.	.
Batagur trivittata	Geoemydidae	Tropical	Aquatic	580				42	67		18 to 25			Bonin et al. 2006. Turtles of the Wolrd.	.
Cuora amboinensis	Geoemydidae	Tropical	Aquatic	190				30	52		2 to 4	3 to 4		Elgar, M. and Heaphy, L.J., 1989. Covariation between clutch size, egg weight and egg shape: comparative evidence for chelonians. Journal of Zoology, 219(1), pp.137-152.	Highfield, 1996. Practical encyclopedia of keeping and breeding tortoises and freshwater turtles.Carapace Press. London.	.		4 subspecies (amboinensis, couro, kamaroma, lineata)
Cuora flavomarginata	Geoemydidae	Temperate	Aquatic	180	168		26.7	28	53.5		1 to 3	2		Elgar, M. and Heaphy, L.J., 1989. Covariation between clutch size, egg weight and egg shape: comparative evidence for chelonians. Journal of Zoology, 219(1), pp.137-152.	Bonin et al. 2006. Turtles of the Wolrd.	Chen and Lue, 1999. Population Characteristics and Egg Production of the Yellow-Margined Box Turtle, Cuora flavomarginata flavomarginata, in Northern Taiwan.	.
Cuora mouhotii	Geoemydidae	Tropical	Terrestrial	170				25	40					Elgar, M. and Heaphy, L.J., 1989. Covariation between clutch size, egg weight and egg shape: comparative evidence for chelonians. Journal of Zoology, 219(1), pp.137-152.	.
Cuora trifusciata	Geoemydidae	Tropical	Aquatic	200				27	50		2 to 3			Elgar, M. and Heaphy, L.J., 1989. Covariation between clutch size, egg weight and egg shape: comparative evidence for chelonians. Journal of Zoology, 219(1), pp.137-152.	Bonin et al. 2006. Turtles of the Wolrd.	.
Cyclemys dentata	Geoemydidae	Tropical	Terrestrial	220				35	57		2 to 4	up to 5		Elgar, M. and Heaphy, L.J., 1989. Covariation between clutch size, egg weight and egg shape: comparative evidence for chelonians. Journal of Zoology, 219(1), pp.137-152.	Highfield, 1996. Practical encyclopedia of keeping and breeding tortoises and freshwater turtles.Carapace Press. London.	.
Cyclemys oldhami	Geoemydidae	Tropical	Aquatic	240				32	57		2 to 4	4 to 6		Bonin et al. 2006. Turtles of the Wolrd.	.
Geoclemys hamiltonii	Geoemydidae	Tropical	Aquatic	350				22	50		19	up to 2		Bonin et al. 2006. Turtles of the Wolrd.	.
Geoemyda japonica	Geoemydidae	Temperate	Terrestrial	160				30	45		4 to 6			Bonin et al. 2006. Turtles of the Wolrd.	.
Geoemyda spengleri	Geoemydidae	Tropical	Terrestrial	130			9	18	47		1 or 2	up to 3		Highfield, 1996. Practical encyclopedia of keeping and breeding tortoises and freshwater turtles.Carapace Press. London.	Bonin et al. 2006. Turtles of the Wolrd.	.
Hardella thurjii	Geoemydidae	Tropical	Aquatic	530				34	60		12 to 16	1		Bonin et al. 2006. Turtles of the Wolrd.	.
Heosemys annandalii	Geoemydidae	Tropical	Aquatic	600					60		4			Bonin et al. 2006. Turtles of the Wolrd.	.
Heosemys grandis	Geoemydidae	Tropical	Aquatic	450				35	65		4 to 8			Highfield, 1996. Practical encyclopedia of keeping and breeding tortoises and freshwater turtles.Carapace Press. London.	Bonin et al. 2006. Turtles of the Wolrd.	Ewert et al., 1994. Patterns of Temperature-Dependent Sex Determination in Turtles.	.
Heosemys spinosa	Geoemydidae	Tropical	Aquatic	220				32	60		1 to 3	Several		Highfield, 1996. Practical encyclopedia of keeping and breeding tortoises and freshwater turtles.Carapace Press. London.	Bonin et al. 2006. Turtles of the Wolrd.	Chan-ard et al.2015. a field guide to the reptiles of thailand.	.	Bonin says that the females have some degree of mobility of the hind plastral lobe, which facilitates the passage of the eggs.
Leucocephalon yuwonoi	Geoemydidae	Tropical	Aquatic	300				45	65		1 to 2	1 to 3		Bonin et al. 2006. Turtles of the Wolrd.	Hagen et al. 2009 Leucocephalon yuwonoi (McCord, Iverson, and Boeadi 1995) – Sulawesi Forest Turtle, Kura-Kura Sulawesi. Conservation biology of freswather turtles and tortoises	.
Malayemys subtrijuga	Geoemydidae	Tropical	Aquatic	270				22	44			4 to 6		Elgar, M. and Heaphy, L.J., 1989. Covariation between clutch size, egg weight and egg shape: comparative evidence for chelonians. Journal of Zoology, 219(1), pp.137-152.	Bonin et al. 2006. Turtles of the Wolrd.	.
Mauremys annamensis	Geoemydidae	Tropical	Aquatic	170										Bonin et al. 2006. Turtles of the Wolrd.	Mazzoleni et al. 2019. Turtles of the genera Geoemyda and Pangshura (Testudines: Geoemydidae) lack differentiated sex chromosomes: the end of a 40-year error cascade for Pangshura.	.
Mauremys caspica	Geoemydidae	Temperate	Aquatic	235				20	35		4 to 6			Elgar, M. and Heaphy, L.J., 1989. Covariation between clutch size, egg weight and egg shape: comparative evidence for chelonians. Journal of Zoology, 219(1), pp.137-152.	Highfield, 1996. Practical encyclopedia of keeping and breeding tortoises and freshwater turtles.Carapace Press. London.	.		3 subspecies (capisca, siebenrocki and ventrimaculata
Mauremys japonica	Geoemydidae	Temperate	Aquatic	209				22	32		5 to 8	2		Highfield, 1996. Practical encyclopedia of keeping and breeding tortoises and freshwater turtles.Carapace Press. London.	Bonin et al. 2006. Turtles of the Wolrd.	.
Mauremys leprosa	Geoemydidae	Temperate	Aquatic	250			9.3	20	36		3 to 13	up to 3		Elgar, M. and Heaphy, L.J., 1989. Covariation between clutch size, egg weight and egg shape: comparative evidence for chelonians. Journal of Zoology, 219(1), pp.137-152.	Naimi et al. 2012. Clutch and egg allometry of the turtle Mauremys leprosa (Chelonia: Geoemydidae) from a polluted peri-urban river in west-central Morocco .	Bonin et al. 2006. Turtles of the Wolrd.	.	7 subspecies (atlantica, erhardi, marokkensis, saharica, vanmeerhaeghei, wernerkaestlei and zizi.
Mauremys mutica	Geoemydidae	Temperate	Aquatic	180			10.28	21	38		Up to 8			Elgar, M. and Heaphy, L.J., 1989. Covariation between clutch size, egg weight and egg shape: comparative evidence for chelonians. Journal of Zoology, 219(1), pp.137-152.	Bonin et al. 2006. Turtles of the Wolrd.	Mazzoleni et al. 2019. Turtles of the genera Geoemyda and Pangshura (Testudines: Geoemydidae) lack differentiated sex chromosomes: the end of a 40-year error cascade for Pangshura.	.
Mauremys nigricans	Geoemydidae	Temperate	Aquatic	269				26	48		2 to 6			Bonin et al. 2006. Turtles of the Wolrd.	Mazzoleni et al. 2019. Turtles of the genera Geoemyda and Pangshura (Testudines: Geoemydidae) lack differentiated sex chromosomes: the end of a 40-year error cascade for Pangshura.	.
Mauremys reeversi	Geoemydidae	Temperate	Aquatic	240	223			23	44		4 to 9	up to 4		Highfield, 1996. Practical encyclopedia of keeping and breeding tortoises and freshwater turtles.Carapace Press. London.	Mazzoleni et al. 2019. Turtles of the genera Geoemyda and Pangshura (Testudines: Geoemydidae) lack differentiated sex chromosomes: the end of a 40-year error cascade for Pangshura.	Lovich and Ernest, 1989. Variation in the Plastral Formulae of Selected Turtles with Comments on Taxonomic Utility.	.
Mauremys rivulata	Geoemydidae	Temperate	Aquatic	200				22	35		around 12	2		Bonin et al. 2006. Turtles of the Wolrd.	.			2 subspecies (rivulata and cretica)
Mauremys sinensis	Geoemydidae	Temperate	Aquatic	220				25	40		3			Elgar, M. and Heaphy, L.J., 1989. Covariation between clutch size, egg weight and egg shape: comparative evidence for chelonians. Journal of Zoology, 219(1), pp.137-152.	.
Melanochelys tricarinata	Geoemydidae	Tropical	Aquatic	163				25	44		at least 3			Bonin et al. 2006. Turtles of the Wolrd.	.			Old females have the back part of plastron flexible.
Melanochelys trijuga	Geoemydidae	Tropical	Terrestrial	385			10.40	35	48		5	2		Elgar, M. and Heaphy, L.J., 1989. Covariation between clutch size, egg weight and egg shape: comparative evidence for chelonians. Journal of Zoology, 219(1), pp.137-152.	Bonin et al. 2006. Turtles of the Wolrd.	Mazzoleni et al. 2019. Turtles of the genera Geoemyda and Pangshura (Testudines: Geoemydidae) lack differentiated sex chromosomes: the end of a 40-year error cascade for Pangshura.	.	6 subspecies (trijuga, coronata, edeniata, indopeninsularis, parkeri, thermalis e wiroti) they have different maximum sizes
Morenia ocellata	Geoemydidae	Tropical	Aquatic	220				22	48		5 to 8			Bonin et al. 2006. Turtles of the Wolrd.	.
Morenia petersi	Geoemydidae	Tropical	Aquatic	220				20	45		6 to 10			Bonin et al. 2006. Turtles of the Wolrd.	.
Notochelys platynota	Geoemydidae	Tropical	Aquatic	360				27	56		2 to 6			Bonin et al. 2006. Turtles of the Wolrd.	.
Orlitia borneensis	Geoemydidae	Tropical	Aquatic	800				40	80		12 to 15			Bonin et al. 2006. Turtles of the Wolrd.	.
Pangshura smithii	Geoemydidae	Tropical	Aquatic	227				23	44		5 to 9	2		Bonin et al. 2006. Turtles of the Wolrd.	.			2 subspecies (smithii and pallidipes)
Pangshura tecta	Geoemydidae	Tropical	Aquatic	240				27	42		3 to 12	2		Bonin et al. 2006. Turtles of the Wolrd.	.
Pangshura tentoria	Geoemydidae	Tropical	Aquatic	271				27	42		4 to 12	2		Bonin et al. 2006. Turtles of the Wolrd.	.			3 subspecies (tentoria, circumdata and flaviventer)
Rhinoclemmys annulata	Geoemydidae	Tropical	Terrestrial	180				36	70		1 to 2			Elgar, M. and Heaphy, L.J., 1989. Covariation between clutch size, egg weight and egg shape: comparative evidence for chelonians. Journal of Zoology, 219(1), pp.137-152.	Bonin et al. 2006. Turtles of the Wolrd.	.
Rhinoclemmys areolata	Geoemydidae	Temperate	Terrestrial	207			50	38.6	71		1	up to 5		Elgar, M. and Heaphy, L.J., 1989. Covariation between clutch size, egg weight and egg shape: comparative evidence for chelonians. Journal of Zoology, 219(1), pp.137-152.	Legler and Vogt, 2013. The tuertles of Mexico, land and freshwater forms. University of Claifornia press. California.	.
Rhinoclemmys diademata	Geoemydidae	Tropical	Aquatic	254				31	56		1 to 3	up to 6		Pritchard and Trebbau, 1984. The turtles of Venezuela.	Rueda-Almonacid et al. 2007. Las tortugas y los cocodrilianos de los países andinos del trópico. Conservacion internacional.	.
Rhinoclemmys funerea	Geoemydidae	Tropical	Aquatic	325				35	68		3	2 to 4		Elgar, M. and Heaphy, L.J., 1989. Covariation between clutch size, egg weight and egg shape: comparative evidence for chelonians. Journal of Zoology, 219(1), pp.137-152.	Highfield, 1996. Practical encyclopedia of keeping and breeding tortoises and freshwater turtles.Carapace Press. London.	.
Rhinoclemmys melanosterna	Geoemydidae	Tropical	Aquatic	300				38	70		2			Rueda-Almonacid et al. 2007. Las tortugas y los cocodrilianos de los países andinos del trópico. Conservacion internacional.	.
Rhinoclemmys nasuta	Geoemydidae	Tropical	Aquatic	220				38	70		1			Rueda-Almonacid et al. 2007. Las tortugas y los cocodrilianos de los países andinos del trópico. Conservacion internacional.	.
Rhinoclemmys pulcherrima	Geoemydidae	Tropical	Terrestrial	206			51.7	39.8	61.7		1 to 3	2		Elgar, M. and Heaphy, L.J., 1989. Covariation between clutch size, egg weight and egg shape: comparative evidence for chelonians. Journal of Zoology, 219(1), pp.137-152.	Legler and Vogt, 2013. The tuertles of Mexico, land and freshwater forms. University of Claifornia press. California.	Mazzoleni et al. 2019. Turtles of the genera Geoemyda and Pangshura (Testudines: Geoemydidae) lack differentiated sex chromosomes: the end of a 40-year error cascade for Pangshura.	.	4 subspecies (pulcherrima, incisa, manni and rogerbarbouri) ////// Bonin says 3-5 eggs mesuring 45X28.
Rhinoclemmys punctularia	Geoemydidae	Tropical	Aquatic	260			38	37	71		1 to 4	1 to 5		Elgar, M. and Heaphy, L.J., 1989. Covariation between clutch size, egg weight and egg shape: comparative evidence for chelonians. Journal of Zoology, 219(1), pp.137-152.	Ferrara et al. 2017. Quelônios amanzônicos guia de identificação e distribuição. Wildlife conservation society. Manaus.	.		2 subspecies (punctularia and flammigera)
Rhinoclemmys rubida	Geoemydidae	Tropical	Terrestrial	179			37.5	29.8	66.1		1			Elgar, M. and Heaphy, L.J., 1989. Covariation between clutch size, egg weight and egg shape: comparative evidence for chelonians. Journal of Zoology, 219(1), pp.137-152.	Legler and Vogt, 2013. The tuertles of Mexico, land and freshwater forms. University of Claifornia press. California.	.		2 subspecies (rubida and perixantha)
Sacalia bealei	Geoemydidae	Tropical	Aquatic	182							2 to 6			Bonin et al. 2006. Turtles of the Wolrd.	.
Siebenrockiella crassicollis	Geoemydidae	Tropical	Aquatic	300				19	45		2 to 5	3 or 4		Elgar, M. and Heaphy, L.J., 1989. Covariation between clutch size, egg weight and egg shape: comparative evidence for chelonians. Journal of Zoology, 219(1), pp.137-152.	Bonin et al. 2006. Turtles of the Wolrd.	Mazzoleni et al. 2019. Turtles of the genera Geoemyda and Pangshura (Testudines: Geoemydidae) lack differentiated sex chromosomes: the end of a 40-year error cascade for Pangshura.	.
Aldabrachelys gigantea	Testudinidae	Tropical	Terrestrial				90	50	55		5 to 19			Bonin et al. 2006. Turtles of the Wolrd.	.
Astrochelys radiata	Testudinidae	Tropical	Terrestrial	355			37.00	50	50		4 to 22	2		Bonin et al. 2006. Turtles of the Wolrd.	.
Astrochelys yniphora	Testudinidae	Tropical	Terrestrial	400			42.8	42	47		4 to 8			Gibbons, 1990. Life history and ecology of the slider turtle. Smithsonian institution press.	Bonin et al. 2006. Turtles of the Wolrd.	.
Centrochelys sulcata	Testudinidae	Tropical	Terrestrial	750			60	41	41		13 to 31	up to 4		Highfield, 1996. Practical encyclopedia of keeping and breeding tortoises and freshwater turtles.Carapace Press. London.	Bonin et al. 2006. Turtles of the Wolrd.	.
Chelonoids carbonaria	Testudinidae	Tropical	Terrestrial	512	410		35 to 50	42	45		1 to 10	2 to 5		Highfield, 1996. Practical encyclopedia of keeping and breeding tortoises and freshwater turtles.Carapace Press. London.	Ferrara et al. 2017. Quelônios amanzônicos guia de identificação e distribuição. Wildlife conservation society. Manaus.	Legler and Vogt, 2013. The tuertles of Mexico, land and freshwater forms. University of Claifornia press. California.	.
Chelonoids chilensis	Testudinidae	Temperate	Terrestrial	280				36	46		3 to 7	1 to 3		Elgar, M. and Heaphy, L.J., 1989. Covariation between clutch size, egg weight and egg shape: comparative evidence for chelonians. Journal of Zoology, 219(1), pp.137-152.	Bonin et al. 2006. Turtles of the Wolrd.	Rueda-Almonacid et al. 2007. Las tortugas y los cocodrilianos de los países andinos del trópico. Conservacion internacional.	.	Rottman, 1969 described a clutch of 5 eggs mesuring 47X38.
Chelonoids denticulata	Testudinidae	Tropical	Terrestrial	700			41,5 to 112	48	48		3 to 15	1 to 4		Highfield, 1996. Practical encyclopedia of keeping and breeding tortoises and freshwater turtles.Carapace Press. London.	Ferrara et al. 2017. Quelônios amanzônicos guia de identificação e distribuição. Wildlife conservation society. Manaus.	.		Records of clutches with 15 eggs.
Chelonoids niger	Testudinidae	Tropical	Terrestrial	1110			106.88	56.5	59.7		4 to 17	3 to 4		Elgar, M. and Heaphy, L.J., 1989. Covariation between clutch size, egg weight and egg shape: comparative evidence for chelonians. Journal of Zoology, 219(1), pp.137-152.	Morlock, 1978. Trutles perspectives and research.	Rueda-Almonacid et al. 2007. Las tortugas y los cocodrilianos de los países andinos del trópico. Conservacion internacional.	.	8 subspecies
Chersobius boulengeri	Testudinidae	Tropical	Terrestrial	110				22	38		1	1		Elgar, M. and Heaphy, L.J., 1989. Covariation between clutch size, egg weight and egg shape: comparative evidence for chelonians. Journal of Zoology, 219(1), pp.137-152.	.
Chersobius signatus	Testudinidae	Tropical	Terrestrial	100				24	34		1 to 2			Bonin et al. 2006. Turtles of the Wolrd.	.
Chersina angulata	Testudinidae	Tropical	Terrestrial	155			28.00	34	39		1	1		Elgar, M. and Heaphy, L.J., 1989. Covariation between clutch size, egg weight and egg shape: comparative evidence for chelonians. Journal of Zoology, 219(1), pp.137-152.	Highfield, 1996. Practical encyclopedia of keeping and breeding tortoises and freshwater turtles.Carapace Press. London.	.
Geochelone elegans	Testudinidae	Tropical	Terrestrial	210			27.40	35	46		2 to 4	2 to 3		Elgar, M. and Heaphy, L.J., 1989. Covariation between clutch size, egg weight and egg shape: comparative evidence for chelonians. Journal of Zoology, 219(1), pp.137-152.	Highfield, 1996. Practical encyclopedia of keeping and breeding tortoises and freshwater turtles.Carapace Press. London.	Morlock, 1978. Trutles perspectives and research.	.
Geochelone platynota	Testudinidae	Tropical	Terrestrial	300				38	55					Bonin et al. 2006. Turtles of the Wolrd.	.
Gopherus agassizi	Testudinidae	Temperate	Terrestrial	279			34	38	46		2 to 15	1 to 3		Elgar, M. and Heaphy, L.J., 1989. Covariation between clutch size, egg weight and egg shape: comparative evidence for chelonians. Journal of Zoology, 219(1), pp.137-152.	Legler and Vogt, 2013. The tuertles of Mexico, land and freshwater forms. University of Claifornia press. California.	.		may lay 14 eggs
Gopherus berlandieri	Testudinidae	Temperate	Terrestrial	220		46.3	30.4	36	50		1 to 7	up to 2		Elgar, M. and Heaphy, L.J., 1989. Covariation between clutch size, egg weight and egg shape: comparative evidence for chelonians. Journal of Zoology, 219(1), pp.137-152.	Legler and Vogt, 2013. The tuertles of Mexico, land and freshwater forms. University of Claifornia press. California.	Vogt e Bull, 1982. Temperature controlled sex determination in turtles: ecological and behavioral aspects.	Long and Rose, 1989. Pelvic Girdle Size Relationships in Three Turtle Species.	may lay each egg from one cltch in different nests.
Gopherus flavomarginatus	Testudinidae	Temperate	Terrestrial	400			54.98	47	47		2 to 12	up to 3		Legler and Vogt, 2013. The tuertles of Mexico, land and freshwater forms. University of Claifornia press. California.	Bonin et al. 2006. Turtles of the Wolrd.	Vogt e Bull, 1982. Temperature controlled sex determination in turtles: ecological and behavioral aspects.	.	May skip one or two years without breeding.
Gopherus polyphemus	Testudinidae	Temperate	Terrestrial	241			44.50	45	45		4 to 7	1		Elgar, M. and Heaphy, L.J., 1989. Covariation between clutch size, egg weight and egg shape: comparative evidence for chelonians. Journal of Zoology, 219(1), pp.137-152.	Highfield, 1996. Practical encyclopedia of keeping and breeding tortoises and freshwater turtles.Carapace Press. London.	Legler and Vogt, 2013. The tuertles of Mexico, land and freshwater forms. University of Claifornia press. California.	.	Can ley 15 eggs (maximum) - Iverson 1977 / up to 25 - highfield 1996
Homopus areolutus	Testudinidae	Tropical	Terrestrial	115				22	30		1 to 5	2		Elgar, M. and Heaphy, L.J., 1989. Covariation between clutch size, egg weight and egg shape: comparative evidence for chelonians. Journal of Zoology, 219(1), pp.137-152.	Highfield, 1996. Practical encyclopedia of keeping and breeding tortoises and freshwater turtles.Carapace Press. London.	.
Homopus femoralis	Testudinidae	Temperate	Terrestrial	153				26	30		1 to 3			Bonin et al. 2006. Turtles of the Wolrd.	.
Indotestudo elongata	Testudinidae	Tropical	Terrestrial	290			28.9	40	50		5 to 9	up to 3		Highfield, 1996. Practical encyclopedia of keeping and breeding tortoises and freshwater turtles.Carapace Press. London.	Bonin et al. 2006. Turtles of the Wolrd.	Lawver, D.R. and Jackson, F.D., 2016. A fossil egg clutch from the stem turtle Meiolania platyceps: implications for the evolution of turtle reproductive biology. Journal of Vertebrate Paleontology, 36(6), p.e1223685.	.
Indotestudo forstenii	Testudinidae	Tropical	Terrestrial	330			25	41	50		3			Highfield, 1996. Practical encyclopedia of keeping and breeding tortoises and freshwater turtles.Carapace Press. London.	.
Indotestudo travancorica	Testudinidae	Tropical	Terrestrial	300				35	55			2 to 4		Bonin et al. 2006. Turtles of the Wolrd.	.
Kinixys belliana	Testudinidae	Tropical	Terrestrial	215			32	38	48		4 to 10	more than 1		Highfield, 1996. Practical encyclopedia of keeping and breeding tortoises and freshwater turtles.Carapace Press. London.	.
Kinixys erosa	Testudinidae	Tropical	Terrestrial	400			25.2	35	45		3 to 5	Several		Bonin et al. 2006. Turtles of the Wolrd.	Lawver, D.R. and Jackson, F.D., 2016. A fossil egg clutch from the stem turtle Meiolania platyceps: implications for the evolution of turtle reproductive biology. Journal of Vertebrate Paleontology, 36(6), p.e1223685.	.
Kinixys homeana	Testudinidae	Tropical	Terrestrial	220				35	45					Highfield, 1996. Practical encyclopedia of keeping and breeding tortoises and freshwater turtles.Carapace Press. London.	Bonin et al. 2006. Turtles of the Wolrd.	.
Kinixys lobatsiana	Testudinidae	Tropical	Terrestrial	200				30	40		6			Bonin et al. 2006. Turtles of the Wolrd.	.
Kinixys natalensis	Testudinidae	Tropical	Terrestrial	160					32		2			Bonin et al. 2006. Turtles of the Wolrd.	.
Kinixys spekii	Testudinidae	Tropical	Terrestrial	200				32	42		2 to 6	Several		Bonin et al. 2006. Turtles of the Wolrd.	.
Malacochersus tornieri	Testudinidae	Temperate	Terrestrial	177			35	29	47		1	2		Elgar, M. and Heaphy, L.J., 1989. Covariation between clutch size, egg weight and egg shape: comparative evidence for chelonians. Journal of Zoology, 219(1), pp.137-152.	Highfield, 1996. Practical encyclopedia of keeping and breeding tortoises and freshwater turtles.Carapace Press. London.	.
Manouria emys phayrei	Testudinidae	Tropical	Terrestrial	600			45 to 65	50	65		35 to 51			Highfield, 1996. Practical encyclopedia of keeping and breeding tortoises and freshwater turtles.Carapace Press. London.	Bonin et al. 2006. Turtles of the Wolrd.	.
Manouria impressa	Testudinidae	Tropical	Terrestrial	300							17 to 22			Highfield, 1996. Practical encyclopedia of keeping and breeding tortoises and freshwater turtles.Carapace Press. London.	.
Psammobates geometricus	Testudinidae	Temperate	Terrestrial	145				26	30		2 to 4	1		Highfield, 1996. Practical encyclopedia of keeping and breeding tortoises and freshwater turtles.Carapace Press. London.	Bonin et al. 2006. Turtles of the Wolrd.	.		say that loveridge and willians, 1957 and Ernst and Barbour, 1989 are wrong when they say it lays 12 - 15 eggs.
Psammobates oculifer	Testudinidae	Temperate	Terrestrial	143				28	34		up to 6			Bonin et al. 2006. Turtles of the Wolrd.	.
Psammobates tentorius	Testudinidae	Temperate	Terrestrial	127				23	30		1 to 3			Elgar, M. and Heaphy, L.J., 1989. Covariation between clutch size, egg weight and egg shape: comparative evidence for chelonians. Journal of Zoology, 219(1), pp.137-152.	Highfield, 1996. Practical encyclopedia of keeping and breeding tortoises and freshwater turtles.Carapace Press. London.	.
Pyxis arachnoides	Testudinidae	Temperate	Terrestrial	150							1			Bonin et al. 2006. Turtles of the Wolrd.	.
Pyxis planicauda	Testudinidae	Temperate	Terrestrial	160				22	35		1 to 2			Bonin et al. 2006. Turtles of the Wolrd.	.
Stigmochelys pardalis	Testudinidae	Tropical	Terrestrial	350 to 700			50	43	43		15 to 20	up to 6		Highfield, 1996. Practical encyclopedia of keeping and breeding tortoises and freshwater turtles.Carapace Press. London.	Bonin et al. 2006. Turtles of the Wolrd.	.		Subspecies have reaaly different clutch sizes.
Testudo graeca	Testudinidae	Temperate	Terrestrial	210			19.34	28	33		5	1	Marrakech, west-central Morocco	Elgar, M. and Heaphy, L.J., 1989. Covariation between clutch size, egg weight and egg shape: comparative evidence for chelonians. Journal of Zoology, 219(1), pp.137-152.	Hichami, N., Znari, M., Naimi, M. and Namous, S., 2016. Clutch, egg and hatchling characteristics in the Souss Valley tortoises, Testudo graeca soussensis Pieh, 2001 (Testudines: Testudinidae) from an arid steppe-land of west-central Morocco. African Journal of Herpetology, 65(1), pp.21-32.	Highfield, 1996. Practical encyclopedia of keeping and breeding tortoises and freshwater turtles.Carapace Press. London.	.	11 subspecies. Data between them are compared by Hichami et al. 2016. Highfields 1996 says 4-7 eggs in one clutch. Some populations can lay up to 4 clutches a year.
Testudo hermanni	Testudinidae	Temperate	Terrestrial	155			12.74	24	29.75		3	2		Elgar, M. and Heaphy, L.J., 1989. Covariation between clutch size, egg weight and egg shape: comparative evidence for chelonians. Journal of Zoology, 219(1), pp.137-152.	Highfield, 1996. Practical encyclopedia of keeping and breeding tortoises and freshwater turtles.Carapace Press. London.	.		Highfields, 1996 says Testudo graeca boettgeri has eggs that are 40mm length and 29.25 width.
Testudo horsfieldi	Testudinidae	Temperate	Terrestrial	193			25	34	47		4 to 7	4		Highfield, 1996. Practical encyclopedia of keeping and breeding tortoises and freshwater turtles.Carapace Press. London.	Bonnet et al. 2010. Is sexual body shape dimorphism consistent in aquatic and terrestrial chelonians? Zoology 113: 213-220.	.
Testudo kleinmunni	Testudinidae	Temperate	Terrestrial	114			9	23	30		1 to 2			Elgar, M. and Heaphy, L.J., 1989. Covariation between clutch size, egg weight and egg shape: comparative evidence for chelonians. Journal of Zoology, 219(1), pp.137-152.	Highfield, 1996. Practical encyclopedia of keeping and breeding tortoises and freshwater turtles.Carapace Press. London.	.
Testudo marginata	Testudinidae	Temperate	Terrestrial	400			18	32	38		6 to 15	1		Highfield, 1996. Practical encyclopedia of keeping and breeding tortoises and freshwater turtles.Carapace Press. London.	Bonin et al. 2006. Turtles of the Wolrd.	Hailey and Loumbourdis, 1987. Egg size and shape, cluthc dynamics, and reproductive effort in european tortoises.	.
Claudius angustatus	Kinosternidae	Tropical	Aquatic	150			7.9	18	32		1 to 6	1 to 5		Elgar, M. and Heaphy, L.J., 1989. Covariation between clutch size, egg weight and egg shape: comparative evidence for chelonians. Journal of Zoology, 219(1), pp.137-152.	Legler and Vogt, 2013. The tuertles of Mexico, land and freshwater forms. University of Claifornia press. California.	.
Kinosternon acutum	Kinosternidae	Tropical	Aquatic	111			9.1	19	38.7		3			Legler and Vogt, 2013. The tuertles of Mexico, land and freshwater forms. University of Claifornia press. California.	.
Kinosternon alamosae	Kinosternidae	Temperate	Aquatic	113			3.66	16.5	29.5		3 to 5	up to 3		Legler and Vogt, 2013. The tuertles of Mexico, land and freshwater forms. University of Claifornia press. California.	Bonin et al. 2006. Turtles of the Wolrd.	Vogt e Bull, 1982. Temperature controlled sex determination in turtles: ecological and behavioral aspects.	.
Kinosternon angustipons	Kinosternidae	Tropical	Aquatic	115				22	40		2	2		Elgar, M. and Heaphy, L.J., 1989. Covariation between clutch size, egg weight and egg shape: comparative evidence for chelonians. Journal of Zoology, 219(1), pp.137-152.	Vogt e Bull, 1982. Temperature controlled sex determination in turtles: ecological and behavioral aspects.	.		Bonin says only one nesting with 4 eggs on avarage
Kinosternon baurii	Kinosternidae	Tropical	Aquatic	114			5.05	19.3	31.8		2 to 4	3	North Florida, USA	Elgar, M. and Heaphy, L.J., 1989. Covariation between clutch size, egg weight and egg shape: comparative evidence for chelonians. Journal of Zoology, 219(1), pp.137-152.	Iverson, J.B., 1977. Reproduction in freshwater and terrestrial turtles of north Florida. Herpetologica, pp.205-212.	Highfield, 1996. Practical encyclopedia of keeping and breeding tortoises and freshwater turtles.Carapace Press. London.	.
Kinosternon chimalhuaca	Kinosternidae	Tropical	Aquatic	130	126	24		18.2	36.6		2 to 5	1		Legler and Vogt, 2013. The tuertles of Mexico, land and freshwater forms. University of Claifornia press. California.	Vogt e Bull, 1982. Temperature controlled sex determination in turtles: ecological and behavioral aspects.	Macíp-Rios et al., 2103. Evidence of Pelvic and Nonpelvic Constraint on Egg Size in Two Species of Kinosternon from Mexico.	.
Kinosternon creaseri	Kinosternidae	Tropical	Aquatic	121			8.9	19.1	38.2		1	3 to 4		Legler and Vogt, 2013. The tuertles of Mexico, land and freshwater forms. University of Claifornia press. California.	Vogt e Bull, 1982. Temperature controlled sex determination in turtles: ecological and behavioral aspects.	.
Kinosternon dunni	Kinosternidae	Tropical	Aquatic	160				25	45		2 to 3	3		Elgar, M. and Heaphy, L.J., 1989. Covariation between clutch size, egg weight and egg shape: comparative evidence for chelonians. Journal of Zoology, 219(1), pp.137-152.	Vogt e Bull, 1982. Temperature controlled sex determination in turtles: ecological and behavioral aspects.	.
Kinosternon flavescens	Kinosternidae	Tropical	Aquatic	114		21.1	4.42	16.6	26.9		3 to 6	1		Elgar, M. and Heaphy, L.J., 1989. Covariation between clutch size, egg weight and egg shape: comparative evidence for chelonians. Journal of Zoology, 219(1), pp.137-152.	Gibbons, 1990. Life history and ecology of the slider turtle. Smithsonian institution press.	Vogt e Bull, 1982. Temperature controlled sex determination in turtles: ecological and behavioral aspects.	Long and Rose, 1989. Pelvic Girdle Size Relationships in Three Turtle Species.	.
Kinosternon herrerai	Kinosternidae	Tropical	Aquatic	160			7.1	18	35		2 to 8	up to 3		Legler and Vogt, 2013. The tuertles of Mexico, land and freshwater forms. University of Claifornia press. California.	Vogt e Bull, 1982. Temperature controlled sex determination in turtles: ecological and behavioral aspects.	.
Kinosternon hirtipes	Kinosternidae	Tropical	Aquatic	108				18.6	33.2		1 to 6	up to 4		Legler and Vogt, 2013. The tuertles of Mexico, land and freshwater forms. University of Claifornia press. California.	Vogt e Bull, 1982. Temperature controlled sex determination in turtles: ecological and behavioral aspects.	.		6 subspecies
Kinosternon integrum	Kinosternidae	Temperate	Aquatic	196	172	30	7.8	19.1	35.4		3 to 12	1 to 4		Legler and Vogt, 2013. The tuertles of Mexico, land and freshwater forms. University of Claifornia press. California.	Vogt e Bull, 1982. Temperature controlled sex determination in turtles: ecological and behavioral aspects.	Macíp-Rios et al., 2103. Evidence of Pelvic and Nonpelvic Constraint on Egg Size in Two Species of Kinosternon from Mexico.	.
Kinosternon leucostomum	Kinosternidae	Tropical	Aquatic	208			12.9	27	43		1 to 6	up to 6		Legler and Vogt, 2013. The tuertles of Mexico, land and freshwater forms. University of Claifornia press. California.	Páez et al. 2012 V. Biología y conservación de las tortugas continentables de Colombia. Humbolt	Vogt e Bull, 1982. Temperature controlled sex determination in turtles: ecological and behavioral aspects.	.
Kinosternon scorpioides	Kinosternidae	Tropical	Aquatic	150			6.08	19	35		1 to 8	1 to 5		Elgar, M. and Heaphy, L.J., 1989. Covariation between clutch size, egg weight and egg shape: comparative evidence for chelonians. Journal of Zoology, 219(1), pp.137-152.	Ferrara et al. 2017. Quelônios amanzônicos guia de identificação e distribuição. Wildlife conservation society. Manaus.	.		2 subspecies
Kinosternon sonoriense	Kinosternidae	Tropical	Aquatic	176			5.6	19	33		2 to 12	2 to 4		Legler and Vogt, 2013. The tuertles of Mexico, land and freshwater forms. University of Claifornia press. California.	.			2 subspecies
Kinosternon subrubrum	Kinosternidae	Temperate	Aquatic	89	85		4.71	15	26		3	3	South Carolina, USA	Elgar, M. and Heaphy, L.J., 1989. Covariation between clutch size, egg weight and egg shape: comparative evidence for chelonians. Journal of Zoology, 219(1), pp.137-152.	Gibbons, J.W., Greene, J.L. and Patterson, K.K., 1982. Variation in reproductive characteristics of aquatic turtles. Copeia, pp.776-784.	Vogt e Bull, 1982. Temperature controlled sex determination in turtles: ecological and behavioral aspects.	.	Mean plastron lenght = 85 mm. Max= 95.
Kinosternon stejnegeri	Kinosternidae	Temperate	Aquatic	158			6.8	19.5	35.2		3 to 7	2 to 3		Legler and Vogt, 2013. The tuertles of Mexico, land and freshwater forms. University of Claifornia press. California.	Vogt e Bull, 1982. Temperature controlled sex determination in turtles: ecological and behavioral aspects.	.
Staurotypus salvini	Kinosternidae	Tropical	Aquatic	220			19	20	41		6 to 10	3		Elgar, M. and Heaphy, L.J., 1989. Covariation between clutch size, egg weight and egg shape: comparative evidence for chelonians. Journal of Zoology, 219(1), pp.137-152.	Legler and Vogt, 2013. The tuertles of Mexico, land and freshwater forms. University of Claifornia press. California.	.
Staurotypus tripocatus	Kinosternidae	Tropical	Aquatic	305			17	24	44		4 to 17	1 to 6		Legler and Vogt, 2013. The tuertles of Mexico, land and freshwater forms. University of Claifornia press. California.	.
Sternotherus carinatus	Kinosternidae	Temperate	Aquatic	127			6.17	18	32		4	2		Elgar, M. and Heaphy, L.J., 1989. Covariation between clutch size, egg weight and egg shape: comparative evidence for chelonians. Journal of Zoology, 219(1), pp.137-152.	Vogt e Bull, 1982. Temperature controlled sex determination in turtles: ecological and behavioral aspects.	.
Sternotherus minor	Kinosternidae	Temperate	Aquatic	100			4.92	17	28		3	2 to 4		Elgar, M. and Heaphy, L.J., 1989. Covariation between clutch size, egg weight and egg shape: comparative evidence for chelonians. Journal of Zoology, 219(1), pp.137-152.	Vogt e Bull, 1982. Temperature controlled sex determination in turtles: ecological and behavioral aspects.	.		Iverson (1977) reports 1-5 eggs/ Clutch
Sternotherus odoratus	Kinosternidae	Temperate	Aquatic	80	80	23.3	3.52	15	27		4	3	South Carolina, USA	Elgar, M. and Heaphy, L.J., 1989. Covariation between clutch size, egg weight and egg shape: comparative evidence for chelonians. Journal of Zoology, 219(1), pp.137-152.	Gibbons, J.W., Greene, J.L. and Patterson, K.K., 1982. Variation in reproductive characteristics of aquatic turtles. Copeia, pp.776-784.	Clark et al. 2001. Physical apertures as constraints on egg size and shape in the Common Musk Turtle, Sternotherus odoratus.	Vogt e Bull, 1982. Temperature controlled sex determination in turtles: ecological and behavioral aspects.	Mean plastron lenght = 80 mm. Max= 90.//////// the pelvic aperture was always wider than the width of the female’s largest egg by at least 3·7 mm.
Sternotherus depressus	Kinosternidae	Temperate	Aquatic	110				35	166		1 to 3	2		Bonin et al. 2006. Turtles of the Wolrd.	Vogt e Bull, 1982. Temperature controlled sex determination in turtles: ecological and behavioral aspects.		.
Chelydra acutirostris	Chelydridae	Tropical	Aquatic	490			15	37	37		11 to 83			Rueda-Almonacid et al. 2007. Las tortugas y los cocodrilianos de los países andinos del trópico. Conservacion internacional.	Páez et al. 2012 V. Biología y conservación de las tortugas continentables de Colombia. Humbolt	Vogt e Bull, 1982. Temperature controlled sex determination in turtles: ecological and behavioral aspects.	.	25 eggs (Rueda-Almonacid)
Chelydra rossignonii	Chelydridae	Tropical	Aquatic	470			16.6	30.9	30.9		26 to 55	1 to 2		Legler and Vogt, 2013. The tuertles of Mexico, land and freshwater forms. University of Claifornia press. California.	.
Chelydra serpentina	Chelydridae	Temperate	Aquatic	258	257		11.10	31	33		10 to 96	3		Elgar, M. and Heaphy, L.J., 1989. Covariation between clutch size, egg weight and egg shape: comparative evidence for chelonians. Journal of Zoology, 219(1), pp.137-152.	Janzen, F.J. and Warner, D.A., 2009. Parent–offspring conflict and selection on egg size in turtles. Journal of evolutionary biology, 22(11), pp.2222-2230.	Legler and Vogt, 2013. The tuertles of Mexico, land and freshwater forms. University of Claifornia press. California.	Galbraith, D.A., Brooks, R.J. and Obbard, M.E., 1989. The influence of growth rate on age and body size at maturity in female snapping turtles (Chelydra serpentina). Copeia, pp.896-904.	tamanhos de ovos variam entre populações. /////// Yntema, C. (1976). Effects of incubation temperatures on sexual differentiation of the turtle Chelydra serpentina. Journal of Morphology 150, 453–462.
Macroclemys temmincki	Chelydridae	Temperate	Aquatic	400			25.83	32	32		30	1		Elgar, M. and Heaphy, L.J., 1989. Covariation between clutch size, egg weight and egg shape: comparative evidence for chelonians. Journal of Zoology, 219(1), pp.137-152.	Vogt e Bull, 1982. Temperature controlled sex determination in turtles: ecological and behavioral aspects.	.
Caretta caretta	Cheloniidae	Temperate	Marine	965			34.40	46	46		120	5		Elgar, M. and Heaphy, L.J., 1989. Covariation between clutch size, egg weight and egg shape: comparative evidence for chelonians. Journal of Zoology, 219(1), pp.137-152.	Frazer, N.B. and Richardson, J.I., 1985. Annual variation in clutch size and frequency for loggerhead turtles, Caretta caretta, nesting at Little Cumberland Island, Georgia, USA. Herpetologica, 41(3), pp.246-251.	.
Natator depressus	Cheloniidae	Tropical	Marine	914			65.32	50	50		50	4		Elgar, M. and Heaphy, L.J., 1989. Covariation between clutch size, egg weight and egg shape: comparative evidence for chelonians. Journal of Zoology, 219(1), pp.137-152.	.
Chelonia mydas	Cheloniidae	Tropical	Marine	1020			51.65	48	48		140	6		Elgar, M. and Heaphy, L.J., 1989. Covariation between clutch size, egg weight and egg shape: comparative evidence for chelonians. Journal of Zoology, 219(1), pp.137-152.	.			up to 11 clutches: Morlock, 1978. Trutles perspectives and research.
Eretmochelys imbricata	Cheloniidae	Tropical	Marine	764			26.40	36	36		112	5		Elgar, M. and Heaphy, L.J., 1989. Covariation between clutch size, egg weight and egg shape: comparative evidence for chelonians. Journal of Zoology, 219(1), pp.137-152.	Morlock, 1978. Trutles perspectives and research.	.
Lepidochelys kempi	Cheloniidae	Tropical	Marine	660			32.39	27	28		110	3		Elgar, M. and Heaphy, L.J., 1989. Covariation between clutch size, egg weight and egg shape: comparative evidence for chelonians. Journal of Zoology, 219(1), pp.137-152.	Morlock, 1978. Trutles perspectives and research.	.
Lepidochelys olivacea	Cheloniidae	Tropical	Marine	655			37.6	40.5	40.5		30 to 168	3		Elgar, M. and Heaphy, L.J., 1989. Covariation between clutch size, egg weight and egg shape: comparative evidence for chelonians. Journal of Zoology, 219(1), pp.137-152.	Pritchard and Trebbau, 1984. The turtles of Venezuela.	.
Dermochelys coriacea	Dermochelyidae	Tropical	Marine	1524			71.89	55	55		86 to 100	1 to 14		Elgar, M. and Heaphy, L.J., 1989. Covariation between clutch size, egg weight and egg shape: comparative evidence for chelonians. Journal of Zoology, 219(1), pp.137-152.	Rueda-Almonacid et al. 2007. Las tortugas y los cocodrilianos de los países andinos del trópico. Conservacion internacional.	.
Platysternon megacephalum	Platysternidae	Tropical	Aquatic	185				22	37		1 to 3	1		Bonin et al. 2006. Turtles of the Wolrd.	Sung, Y.H., Hau, B. and Karraker, N., 2014. Reproduction of endangered Big-headed Turtle, Platysternon megacephalum (Reptilia: Testudines: Platysternidae). Acta Herpetologica, 9(2), pp.243-247.	.
Carettochelys insculpta	Carettochelidae	Tropical	Aquatic	385	305		33.70	43	43		14	2		Elgar, M. and Heaphy, L.J., 1989. Covariation between clutch size, egg weight and egg shape: comparative evidence for chelonians. Journal of Zoology, 219(1), pp.137-152.	Bonin et al. 2006. Turtles of the Wolrd.	Doody et al. 2003. Twice every second year: reproduction in the pig-nosed turtle, Carettochelys insculpta,inthe wet–dry tropics of Australia.	.	Produces 2 clutches a year every second year. (Doody et al. 2003. Twice every second year: reproduction in the pig-nosed turtle, Carettochelys insculpta,inthe wet–dry tropics of Australia)
Dermatemys mawii	Dermatemyidae	Tropical	Aquatic	650			50	37	62		10 to 24	up to 4	Tzendales e Lacantún rivers, Mexico	Legler and Vogt, 2013. The tuertles of Mexico, land and freshwater forms. University of Claifornia press. California.	.
Amyda cartilaginea	Trionychidae	Tropical	Aquatic	800				33	33		3 to 6	3 to 4		Bonin et al. 2006. Turtles of the Wolrd.	Chan-ard et al.2015. a field guide to the reptiles of thailand.	.
Apalone ferox	Trionychidae	Tropical	Aquatic	600			14.02	25	25		4 to 24	2 to 6		Elgar, M. and Heaphy, L.J., 1989. Covariation between clutch size, egg weight and egg shape: comparative evidence for chelonians. Journal of Zoology, 219(1), pp.137-152.	Bonin et al. 2006. Turtles of the Wolrd.	Highfield, 1996. Practical encyclopedia of keeping and breeding tortoises and freshwater turtles.Carapace Press. London.	.
Apalone mutica	Trionychidae	Temperate	Aquatic	360			9.43	22	22		3 to 33	up to 3		Elgar, M. and Heaphy, L.J., 1989. Covariation between clutch size, egg weight and egg shape: comparative evidence for chelonians. Journal of Zoology, 219(1), pp.137-152.	Highfield, 1996. Practical encyclopedia of keeping and breeding tortoises and freshwater turtles.Carapace Press. London.	Kuchling and Kitimasak, 2010. Male Biased Sex Ratio in Captive Bred Siamese Narrow-headed Softshell Turtles, Chitra chitra: Does the Incubation Temperature Influence Hatchling Sex in the Family Trionychidae?	Janzen, F.J. and Warner, D.A., 2009. Parent–offspring conflict and selection on egg size in turtles. Journal of evolutionary biology, 22(11), pp.2222-2230.	2 subspecies. Bonin et al. Says sex determination is NOT temperature dependant......
Apalone spinifera	Trionychidae	Temperate	Aquatic	550			11.90	30	30		4 to 39	up to 2		Elgar, M. and Heaphy, L.J., 1989. Covariation between clutch size, egg weight and egg shape: comparative evidence for chelonians. Journal of Zoology, 219(1), pp.137-152.	Highfield, 1996. Practical encyclopedia of keeping and breeding tortoises and freshwater turtles.Carapace Press. London.	Kuchling and Kitimasak, 2010. Male Biased Sex Ratio in Captive Bred Siamese Narrow-headed Softshell Turtles, Chitra chitra: Does the Incubation Temperature Influence Hatchling Sex in the Family Trionychidae?	.	6 subspecies ////// 4 or 5 clutches: Morlock, 1978. Trutles perspectives and research.
Chitra chitra	Trionychidae	Tropical	Aquatic	1100							60 to 110			Bonin et al. 2006. Turtles of the Wolrd.	Chan-ard et al.2015. a field guide to the reptiles of thailand.	Kuchling and Kitimasak, 2010. Male Biased Sex Ratio in Captive Bred Siamese Narrow-headed Softshell Turtles, Chitra chitra: Does the Incubation Temperature Influence Hatchling Sex in the Family Trionychidae?	.
Chitra indica	Trionychidae	Tropical	Aquatic	1150				34	34		60 to 178			Bonin et al. 2006. Turtles of the Wolrd.	.
Cyclanorbis senegalensis	Trionychidae	Tropical	Aquatic	600				25	45		around 12	several		Bonin et al. 2006. Turtles of the Wolrd.	.			Egg 36X36: Morlock, 1978. Trutles perspectives and research.
Cycloderma aubryi	Trionychidae	Tropical	Aquatic					33	39		15 to 35	2		Bonin et al. 2006. Turtles of the Wolrd.	.
Cycloderma frenatum	Trionychidae	Tropical	Aquatic	508				30	35		15 to 25			Elgar, M. and Heaphy, L.J., 1989. Covariation between clutch size, egg weight and egg shape: comparative evidence for chelonians. Journal of Zoology, 219(1), pp.137-152.	Bonin et al. 2006. Turtles of the Wolrd.	.
Dogania subplana	Trionychidae	Tropical	Aquatic	350				31	31		3 to 7			Bonin et al. 2006. Turtles of the Wolrd.	.
Lissemys punctata	Trionychidae	Tropical	Aquatic	229				28	28		10	2		Elgar, M. and Heaphy, L.J., 1989. Covariation between clutch size, egg weight and egg shape: comparative evidence for chelonians. Journal of Zoology, 219(1), pp.137-152.	.
Nilssonia gangeticus	Trionychidae	Tropical	Aquatic	700				30	33		8 to 32			Bonin et al. 2006. Turtles of the Wolrd.	.
Nilssonia hurum	Trionychidae	Tropical	Aquatic	600				30	30		20 to 30	up to 3		Bonin et al. 2006. Turtles of the Wolrd.	.
Nilssonia leithii	Trionychidae	Tropical	Aquatic	600				30	30			several		Bonin et al. 2006. Turtles of the Wolrd.	.
Nilssonia nigricans	Trionychidae	Tropical	Aquatic	910							up to 38	several		Bonin et al. 2006. Turtles of the Wolrd.	.
Palea steindachneri	Trionychidae	Tropical	Aquatic	430				22	22		3 to 8			Bonin et al. 2006. Turtles of the Wolrd.	.
Pelochelys bibroni	Trionychidae	Tropical	Aquatic	1000				30	30		22 to 100	2		Bonin et al. 2006. Turtles of the Wolrd.	Morlock, 1978. Trutles perspectives and research.	.
Pelochelys cantorii	Trionychidae	Tropical	Aquatic	1300							around 30	1		Bonin et al. 2006. Turtles of the Wolrd.	.
Pelodiscus sinensis	Trionychidae	Temperate	Aquatic	350			6.2	25	25		10 to 35	several		Bonin et al. 2006. Turtles of the Wolrd.	Ji X., F. Chen, W.-G. Du, and H.-L. Chen. 2003. Incubation temperature affects hatchling growth but not sexual phenotype in the Chinese soft-shelled turtle, Pelodiscus sinensis (Trionychidae). J Zool (Lond) 261:409–416.	.		Kuchling and Kitimasak, 2010: Although two studies of Pelodiscus sinensis consider the species to have GSD (Choo and Chou, 1992; Ji et al., 2003), three other studies concluded that temperature does influence the sex ratio in these species and that the P. sinensis has TSD (Zhu and Sun, 2000; Nie et al., 2001; Ran and Yuan, 2004). Although P. sinensis does not have heteromorphic sex chromosomes (N…
Rafetus euphraticus	Trionychidae	Tropical	Aquatic	500				23	23		around 10	several		Bonin et al. 2006. Turtles of the Wolrd.	.
Trionix triunguis	Trionychidae	Tropical	Aquatic	1200			18	30	30		around 40			Bonin et al. 2006. Turtles of the Wolrd.	Leshem et al. 1990. Growth, Water, and Energy Metabolism of the Soft-shelled Turtle (Trionyx triunguis) Embryo: Effects of Temperature.	.

## Sheet: TurtPereira
species	family	Suborder	Climatic_zone	Zoogeography	Habitat	diet	carap	eggwidth	egglenght	clutchmin	clutchmax	clutchesyearmin	clutchesyearmax
Acanthochelys_spixii	Chelidae	Pleurodira	Tropical	Neotropical	Aquatic	Carnivore	170	25	27	1	9	1	1
Acanthochelys_macrocephala	Chelidae	Pleurodira	Tropical	Neotropical	Aquatic	Carnivore	295	28	30	1	8	1	1
Chelodina_oblonga	Chelidae	Pleurodira	Tropical	Australian	Aquatic	Carnivore	275	23.5	36.7	9	16	2	2
Chelodina_longicollis	Chelidae	Pleurodira	Temperate	Australian	Aquatic	Carnivore	178	20.6	37.1	6	23	3	3
Chelodina_mccordi	Chelidae	Pleurodira	Tropical	Australian	Aquatic	Carnivore	232	21	30	7	16	1	2
Chelus_fimbriatus	Chelidae	Pleurodira	Tropical	Neotropical	Aquatic	Carnivore	381	35	36	12	28	1	1
Elseya_albagula	Chelidae	Pleurodira	Tropical	Australian	Aquatic	Omnivore	400	34.4	57.5	10	16	1	1
Elseya_branderhorsti	Chelidae	Pleurodira	Tropical	Australian	Aquatic	Omnivore	500	29.8	52.6	15	32	1	2
Elseya_dentata	Chelidae	Pleurodira	Tropical	Australian	Aquatic	Omnivore	285	30	50	8	12	1	2
Elusor_macrurus	Chelidae	Pleurodira	Temperate	Australian	Aquatic	Omnivore	378	25	35	10	16	1	1
Emydura_macquarii	Chelidae	Pleurodira	Temperate	Australian	Aquatic	Omnivore	310	23	33	18	33	1	2
Emydura_victoriae	Chelidae	Pleurodira	Tropical	Australian	Aquatic	Omnivore	160	22	39	6	18	1	2
Hydromedusa_maximiliani	Chelidae	Pleurodira	Tropical	Neotropical	Aquatic	Carnivore	177	25	45.4	1	3	1	1
Hydromedusa_tectifera	Chelidae	Pleurodira	Tropical	Neotropical	Aquatic	Carnivore	300	28	36	5	15	1	1
Mesoclemmys_dahli	Chelidae	Pleurodira	Tropical	Neotropical	Aquatic	Carnivore	184	29	36	1	6	1	6
Mesoclemmys_gibba	Chelidae	Pleurodira	Tropical	Neotropical	Aquatic	Carnivore	230	32	45	1	5	1	2
Mesoclemmys_heliostemma	Chelidae	Pleurodira	Tropical	Neotropical	Aquatic	Carnivore	300	41.4	50.8	2	11	2	2
Mesoclemmys_raniceps	Chelidae	Pleurodira	Tropical	Neotropical	Aquatic	Carnivore	370	30	40	4	6	1	6
Mesoclemmys_vanderhaegei	Chelidae	Pleurodira	Tropical	Neotropical	Aquatic	Omnivore	262	28.5	35	3	14	1	2
Myuchelys_bellii	Chelidae	Pleurodira	Temperate	Australian	Aquatic	Omnivore	400	21	32	8	23	1	1
Phrynops_geoffroanus	Chelidae	Pleurodira	Tropical	Neotropical	Aquatic	Omnivore	350	32	34	10	28	1	4
Phrynops_hilarii	Chelidae	Pleurodira	Tropical	Neotropical	Aquatic	Omnivore	400	37	37	8	32	2	2
Platemys_platycephala	Chelidae	Pleurodira	Tropical	Neotropical	Aquatic	Omnivore	180	28	51	1	1	1	1
Pseudemydura_umbrina	Chelidae	Pleurodira	Temperate	Australian	Aquatic	Carnivore	130	20	35	4	4	1	1
Rheodytes_leukops	Chelidae	Pleurodira	Tropical	Australian	Aquatic	Omnivore	249	21	30	13	13	4	4
Rhinemys_rufipes	Chelidae	Pleurodira	Tropical	Neotropical	Aquatic	Omnivore	270	42	47	3	12	2	2
Erymnochelys_madagascariensis	Podocnemididae	Pleurodira	Tropical	Ethiopian	Aquatic	Herbivore	480	29.95	47.1	6	29	1	3
Peltocephalus_dumerilianus	Podocnemididae	Pleurodira	Tropical	Neotropical	Aquatic	Omnivore	500	37	55	3	25	1	2
Podocnemis_erythrocephala	Podocnemididae	Pleurodira	Tropical	Neotropical	Aquatic	Herbivore	320	25	43.5	2	18	1	4
Podocnemis_expansa	Podocnemididae	Pleurodira	Tropical	Neotropical	Aquatic	Herbivore	1000	41.48	44.58	84	126	1	1
Podocnemis_lewyana	Podocnemididae	Pleurodira	Tropical	Neotropical	Aquatic	Herbivore	500	44	45	10	40	2	3
Podocnemis_sextuberculata	Podocnemididae	Pleurodira	Tropical	Neotropical	Aquatic	Herbivore	300	27	44	6	39	1	3
Podocnemis_unifilis	Podocnemididae	Pleurodira	Tropical	Neotropical	Aquatic	Herbivore	500	28	41	4	52	2	2
Podocnemis_vogli	Podocnemididae	Pleurodira	Tropical	Neotropical	Aquatic	Herbivore	340	29	48	7	18	1	4
Pelomedusa_subrufa	Pelomedusidae	Pleurodira	Tropical	Ethiopian	Aquatic	Carnivore	170	22	38	12	15	1	1
Pelusios_castanoides	Pelomedusidae	Pleurodira	Tropical	Ethiopian	Aquatic	Carnivore	220	22	32	5	25	1	1
Actinemys_marmorata	Emydidae	Cryptodira	Temperate	Neartic	Aquatic	Omnivore	210	23	43	1	13	1	2
Chrysemys_picta	Emydidae	Cryptodira	Temperate	Neartic	Aquatic	Omnivore	125	16	30	4	4	4	4
Clemmys_guttata	Emydidae	Cryptodira	Temperate	Neartic	Aquatic	Omnivore	102	16	29	2	4	1	1
Glyptemys_insculpta	Emydidae	Cryptodira	Temperate	Neartic	Aquatic	Omnivore	185	23	33	4	8	1	1
Glyptemys_muhlenbergii	Emydidae	Cryptodira	Temperate	Neartic	Aquatic	Omnivore	76	15	30	2	6	1	1
Deirochelys_reticularia	Emydidae	Cryptodira	Temperate	Neartic	Aquatic	Omnivore	150	23	37	8	8	3	3
Emydoidea_blandingii	Emydidae	Cryptodira	Temperate	Neartic	Aquatic	Omnivore	190	24	39	3	19	1	3
Emys_orbicularis	Emydidae	Cryptodira	Temperate	Paleartic	Aquatic	Omnivore	140	17	30	10	10	1	1
Graptemys_barbouri	Emydidae	Cryptodira	Temperate	Neartic	Aquatic	Omnivore	270	26	36	7	11	2	2
Graptemys_geographica	Emydidae	Cryptodira	Temperate	Neartic	Aquatic	Omnivore	220	22	33	9	20	3	3
Graptemys_ouachitensis	Emydidae	Cryptodira	Temperate	Neartic	Aquatic	Omnivore	240	25	32	12	12	2	3
Graptemys_pseudogeographica	Emydidae	Cryptodira	Temperate	Neartic	Aquatic	Omnivore	205	22	35	9	9	3	3
Graptemys_pulchra	Emydidae	Cryptodira	Temperate	Neartic	Aquatic	Omnivore	270	32	42	4	6	5	5
Malaclemys_terrapin	Emydidae	Cryptodira	Temperate	Neartic	Aquatic	Omnivore	238	26	42	4	18	5	5
Pseudemys_concinna	Emydidae	Cryptodira	Temperate	Neartic	Aquatic	Omnivore	300	27	42	18	18	4	4
Pseudemys_rubriventris	Emydidae	Cryptodira	Temperate	Neartic	Aquatic	Omnivore	400	24	37	6	25	2	2
Terrapene_carolina	Emydidae	Cryptodira	Temperate	Neartic	Terrestrial	Omnivore	114	22	38	3	5	4	4
Terrapene_coahuila	Emydidae	Cryptodira	Temperate	Neartic	Aquatic	Omnivore	120	17	33	2	4	1	3
Terrapene_nelsoni	Emydidae	Cryptodira	Tropical	Neartic	Terrestrial	Omnivore	145	27	42	1	4	1	1
Terrapene_ornata	Emydidae	Cryptodira	Temperate	Neartic	Terrestrial	Omnivore	146	23	31	2	6	1	2
Trachemys_dorbigni	Emydidae	Cryptodira	Tropical	Neotropical	Aquatic	Omnivore	260	26	40.7	6	19	3	3
Trachemys_scripta	Emydidae	Cryptodira	Tropical	Neartic	Aquatic	Omnivore	210	26	39	6	18	2	2
Trachemys_stejnegeri	Emydidae	Cryptodira	Tropical	Neotropical	Aquatic	Omnivore	240	26	43	3	14	3	3
Trachemys_venusta	Emydidae	Cryptodira	Tropical	Neotropical	Aquatic	Omnivore	500	34	47	12	32	1	6
Batagur_baska	Geoemydidae	Cryptodira	Tropical	Oriental	Aquatic	Omnivore	540	40	76	15	35	3	3
Batagur_borneoensis	Geoemydidae	Cryptodira	Tropical	Oriental	Aquatic	Herbivore	600	40	72	15	25	3	3
Cuora_amboinensis	Geoemydidae	Cryptodira	Tropical	Oriental	Aquatic	Omnivore	190	30	52	2	4	3	4
Cuora_flavomarginata	Geoemydidae	Cryptodira	Temperate	Oriental	Aquatic	Omnivore	180	28	53.5	1	3	2	2
Cyclemys_dentata	Geoemydidae	Cryptodira	Tropical	Oriental	Aquatic	Omnivore	220	35	57	2	4	1	5
Cyclemys_oldhami	Geoemydidae	Cryptodira	Tropical	Oriental	Aquatic	Omnivore	240	32	57	2	4	4	6
Geoclemys_hamiltonii	Geoemydidae	Cryptodira	Tropical	Oriental	Aquatic	Omnivore	350	22	50	19	19	1	2
Geoemyda_spengleri	Geoemydidae	Cryptodira	Tropical	Paleartic	Terrestrial	Omnivore	130	18	47	1	2	1	3
Hardella_thurjii	Geoemydidae	Cryptodira	Tropical	Oriental	Aquatic	Herbivore	530	34	60	12	16	1	1
Heosemys_grandis	Geoemydidae	Cryptodira	Tropical	Oriental	Aquatic	Herbivore	450	35	65	4	8	1	2
Heosemys_spinosa	Geoemydidae	Cryptodira	Tropical	Oriental	Aquatic	Herbivore	220	32	60	1	3	2	3
Leucocephalon_yuwonoi	Geoemydidae	Cryptodira	Tropical	Oriental	Aquatic	Omnivore	300	45	65	1	2	1	3
Malayemys_subtrijuga	Geoemydidae	Cryptodira	Tropical	Oriental	Aquatic	Carnivore	270	22	44	3	10	4	6
Mauremys_japonica	Geoemydidae	Cryptodira	Temperate	Paleartic	Aquatic	Omnivore	209	22	32	5	8	2	2
Mauremys_leprosa	Geoemydidae	Cryptodira	Temperate	Paleartic	Aquatic	Omnivore	250	20	36	3	13	1	3
Mauremys_reevesii	Geoemydidae	Cryptodira	Temperate	Paleartic	Aquatic	Omnivore	240	23	44	4	9	1	4
Mauremys_rivulata	Geoemydidae	Cryptodira	Temperate	Paleartic	Aquatic	Omnivore	200	22	35	12	12	2	2
Melanochelys_trijuga	Geoemydidae	Cryptodira	Tropical	Oriental	Aquatic	Omnivore	385	35	48	5	5	2	2
Morenia_petersi	Geoemydidae	Cryptodira	Tropical	Oriental	Aquatic	Omnivore	220	20	45	6	10	1	1
Notochelys_platynota	Geoemydidae	Cryptodira	Tropical	Oriental	Aquatic	Herbivore	360	27	56	2	6	?	?
Orlitia_borneensis	Geoemydidae	Cryptodira	Tropical	Oriental	Aquatic	Omnivore	800	40	80	12	15	1	2
Pangshura_smithii	Geoemydidae	Cryptodira	Tropical	Oriental	Aquatic	Omnivore	227	23	44	5	9	2	2
Pangshura_tecta	Geoemydidae	Cryptodira	Tropical	Oriental	Aquatic	Omnivore	240	27	42	3	12	2	2
Pangshura_tentoria	Geoemydidae	Cryptodira	Tropical	Oriental	Aquatic	Omnivore	271	27	42	4	12	2	2
Rhinoclemmys_areolata	Geoemydidae	Cryptodira	Temperate	Neotropical	Aquatic	Omnivore	207	38.6	71	1	1	1	5
Rhinoclemmys_diademata	Geoemydidae	Cryptodira	Tropical	Neotropical	Aquatic	Omnivore	254	31	56	1	3	1	6
Rhinoclemmys_funerea	Geoemydidae	Cryptodira	Tropical	Neotropical	Aquatic	Omnivore	325	35	68	3	3	2	4
Rhinoclemmys_pulcherrima	Geoemydidae	Cryptodira	Tropical	Neotropical	Terrestrial	Omnivore	206	39.8	61.7	1	3	2	2
Rhinoclemmys_punctularia	Geoemydidae	Cryptodira	Tropical	Neotropical	Aquatic	Omnivore	260	37	71	1	4	1	5
Sacalia_bealei	Geoemydidae	Cryptodira	Tropical	Paleartic	Aquatic	Omnivore	182	23.2	45.5	1	6	1	1
Siebenrockiella_crassicollis	Geoemydidae	Cryptodira	Tropical	Oriental	Aquatic	Carnivore	300	19	45	2	5	3	4
Aldabrachelys_gigantea	Testudinidae	Cryptodira	Tropical	Ethiopian	Terrestrial	Herbivore	1220	50	55	5	19	3	3
Astrochelys_radiata	Testudinidae	Cryptodira	Tropical	Ethiopian	Terrestrial	Herbivore	430	50	50	8	22	2	3
Chelonoidis_carbonarius	Testudinidae	Cryptodira	Tropical	Neotropical	Terrestrial	Herbivore	512	42	45	1	10	2	5
Chelonoidis_chilensis	Testudinidae	Cryptodira	Temperate	Neotropical	Terrestrial	Herbivore	280	36	46	2	10	1	4
Chelonoidis_denticulatus	Testudinidae	Cryptodira	Tropical	Neotropical	Terrestrial	Herbivore	700	48	48	3	15	1	4
Chelonoidis_niger	Testudinidae	Cryptodira	Tropical	Neotropical	Terrestrial	Herbivore	1110	56.5	59.7	4	17	3	4
Stigmochelys_pardalis	Testudinidae	Cryptodira	Tropical	Ethiopian	Terrestrial	Herbivore	700	43	43	15	20	1	6
Centrochelys_sulcata	Testudinidae	Cryptodira	Tropical	Ethiopian	Terrestrial	Herbivore	750	41	41	13	31	1	4
Chersina_angulata	Testudinidae	Cryptodira	Tropical	Ethiopian	Terrestrial	Herbivore	155	34	39	1	1	1	1
Homopus_boulengeri	Testudinidae	Cryptodira	Tropical	Ethiopian	Terrestrial	Herbivore	110	22	38	1	1	1	1
Geochelone_elegans	Testudinidae	Cryptodira	Tropical	Oriental	Terrestrial	Herbivore	210	35	46	2	4	2	3
Gopherus_agassizii	Testudinidae	Cryptodira	Temperate	Neartic	Terrestrial	Herbivore	279	38	46	2	15	1	3
Gopherus_berlandieri	Testudinidae	Cryptodira	Temperate	Neartic	Terrestrial	Herbivore	220	36	50	1	7	1	2
Gopherus_flavomarginatus	Testudinidae	Cryptodira	Temperate	Neartic	Terrestrial	Herbivore	400	47	47	2	12	1	3
Gopherus_polyphemus	Testudinidae	Cryptodira	Temperate	Neartic	Terrestrial	Herbivore	241	45	45	4	7	1	1
Indotestudo_elongata	Testudinidae	Cryptodira	Tropical	Oriental	Terrestrial	Herbivore	290	40	50	5	9	1	3
Kinixys_belliana	Testudinidae	Cryptodira	Tropical	Ethiopian	Terrestrial	Herbivore	215	38	48	4	10	1	2
Malacochersus_tornieri	Testudinidae	Cryptodira	Temperate	Ethiopian	Terrestrial	Herbivore	177	29	47	1	1	2	2
Manouria_emys	Testudinidae	Cryptodira	Tropical	Oriental	Terrestrial	Herbivore	600	50	65	35	51	1	1
Pyxis_arachnoides	Testudinidae	Cryptodira	Temperate	Ethiopian	Terrestrial	Herbivore	150	10	15	1	1	3	4
Testudo_graeca	Testudinidae	Cryptodira	Temperate	Paleartic	Terrestrial	Herbivore	210	28	33	5	5	1	1
Testudo_hermanni	Testudinidae	Cryptodira	Temperate	Paleartic	Terrestrial	Herbivore	155	24	29.75	3	3	2	2
Testudo_horsfieldii	Testudinidae	Cryptodira	Temperate	Paleartic	Terrestrial	Herbivore	193	34	47	4	7	4	4
Testudo_marginata	Testudinidae	Cryptodira	Temperate	Paleartic	Terrestrial	Herbivore	400	32	38	6	15	1	1
Claudius_angustatus	Kinosternidae	Cryptodira	Tropical	Neartic	Aquatic	Carnivore	150	18	32	1	6	1	5
Kinosternon_alamosae	Kinosternidae	Cryptodira	Temperate	Neotropical	Aquatic	Carnivore	113	16.5	29.5	3	5	1	3
Kinosternon_angustipons	Kinosternidae	Cryptodira	Tropical	Neotropical	Aquatic	Carnivore	115	22	40	2	2	2	2
Kinosternon_baurii	Kinosternidae	Cryptodira	Tropical	Neartic	Aquatic	Carnivore	114	19.3	31.8	2	4	3	3
Kinosternon_chimalhuaca	Kinosternidae	Cryptodira	Tropical	Neotropical	Aquatic	Carnivore	130	18.2	36.6	2	5	1	1
Kinosternon_creaseri	Kinosternidae	Cryptodira	Tropical	Neotropical	Aquatic	Carnivore	121	19.1	38.2	1	1	3	4
Kinosternon_dunni	Kinosternidae	Cryptodira	Tropical	Neotropical	Aquatic	Carnivore	160	25	45	2	3	3	3
Kinosternon_flavescens	Kinosternidae	Cryptodira	Tropical	Neartic	Aquatic	Carnivore	114	16.6	26.9	3	6	1	1
Kinosternon_herrerai	Kinosternidae	Cryptodira	Tropical	Neotropical	Aquatic	Carnivore	160	18	35	2	8	1	3
Kinosternon_hirtipes	Kinosternidae	Cryptodira	Tropical	Neartic	Aquatic	Carnivore	108	18.6	33.2	1	6	1	4
Kinosternon_integrum	Kinosternidae	Cryptodira	Temperate	Neartic	Aquatic	Carnivore	196	19.1	35.4	3	12	1	4
Kinosternon_leucostomum	Kinosternidae	Cryptodira	Tropical	Neotropical	Aquatic	Carnivore	208	27	43	1	6	1	6
Kinosternon_scorpioides	Kinosternidae	Cryptodira	Tropical	Neotropical	Aquatic	Carnivore	150	19	35	1	8	1	5
Kinosternon_sonoriense	Kinosternidae	Cryptodira	Tropical	Neartic	Aquatic	Carnivore	176	19	33	2	12	2	4
Kinosternon_subrubrum	Kinosternidae	Cryptodira	Temperate	Neartic	Aquatic	Carnivore	89	15	26	3	3	3	3
Staurotypus_salvinii	Kinosternidae	Cryptodira	Tropical	Neartic	Aquatic	Carnivore	220	20	41	6	10	3	3
Staurotypus_triporcatus	Kinosternidae	Cryptodira	Tropical	Neartic	Aquatic	Carnivore	305	24	44	4	17	1	6
Sternotherus_carinatus	Kinosternidae	Cryptodira	Temperate	Neartic	Aquatic	Carnivore	127	18	32	4	4	2	2
Sternotherus_minor	Kinosternidae	Cryptodira	Temperate	Neartic	Aquatic	Carnivore	100	17	28	3	3	2	4
Sternotherus_odoratus	Kinosternidae	Cryptodira	Temperate	Neartic	Aquatic	Carnivore	80	15	27	4	4	3	3
Sternotherus_depressus	Kinosternidae	Cryptodira	Temperate	Neartic	Aquatic	Carnivore	110	16.6	35	1	3	2	2
Chelydra_serpentina	Chelydridae	Cryptodira	Temperate	Neartic	Aquatic	Carnivore	258	31	33	10	96	3	3
Macrochelys_temminckii	Chelydridae	Cryptodira	Temperate	Neartic	Aquatic	Carnivore	400	32	32	30	30	1	1
Caretta_caretta	Cheloniidae	Cryptodira	Tropical	Oceanic	Oceanic	Carnivore	965	46	46	120	120	5	5
Natator_depressus	Cheloniidae	Cryptodira	Tropical	Oceanic	Oceanic	Omnivore	914	50	50	50	50	4	4
Chelonia_mydas	Cheloniidae	Cryptodira	Tropical	Oceanic	Oceanic	Herbivore	1020	48	48	140	140	6	6
Eretmochelys_imbricata	Cheloniidae	Cryptodira	Tropical	Oceanic	Oceanic	Carnivore	764	36	36	112	112	5	5
Lepidochelys_kempii	Cheloniidae	Cryptodira	Tropical	Oceanic	Oceanic	Carnivore	660	27	28	110	110	3	3
Lepidochelys_olivacea	Cheloniidae	Cryptodira	Tropical	Oceanic	Oceanic	Omnivore	655	40.5	40.5	30	168	3	3
Dermochelys_coriacea	Dermochelyidae	Cryptodira	Tropical	Oceanic	Oceanic	Carnivore	1524	55	55	86	100	1	14
Platysternon_megacephalum	Platysternidae	Cryptodira	Tropical	Oriental	Aquatic	Carnivore	185	22	37	1	3	1	1
Carettochelys_insculpta	Carettochelidae	Cryptodira	Tropical	Australian	Aquatic	Herbivore	385	43	43	14	14	2	2
Dermatemys_mawii	Dermatemyidae	Cryptodira	Tropical	Neotropical	Aquatic	Herbivore	650	37	62	10	24	1	4
Amyda_cartilaginea	Trionychidae	Cryptodira	Tropical	Oriental	Aquatic	Carnivore	800	33	33	3	6	3	4
Apalone_ferox	Trionychidae	Cryptodira	Tropical	Neartic	Aquatic	Carnivore	600	25	25	4	24	2	6
Apalone_mutica	Trionychidae	Cryptodira	Temperate	Neartic	Aquatic	Carnivore	360	22	22	3	33	1	3
Apalone_spinifera	Trionychidae	Cryptodira	Temperate	Neartic	Aquatic	Carnivore	550	30	30	4	39	1	2
Chitra_chitra	Trionychidae	Cryptodira	Tropical	Oriental	Aquatic	Carnivore	1100	30	30	60	110	3	4
Cyclanorbis_senegalensis	Trionychidae	Cryptodira	Tropical	Ethiopian	Aquatic	Carnivore	600	25	45	12	12	2	4
Cycloderma_aubryi	Trionychidae	Cryptodira	Tropical	Ethiopian	Aquatic	Carnivore	500	33	39	15	35	2	2
Dogania_subplana	Trionychidae	Cryptodira	Tropical	Oriental	Aquatic	Carnivore	350	31	31	3	7	1	2
Lissemys_punctata	Trionychidae	Cryptodira	Tropical	Oriental	Aquatic	Carnivore	229	28	28	10	10	2	2
Nilssonia_hurum	Trionychidae	Cryptodira	Tropical	Oriental	Aquatic	Carnivore	600	30	30	20	30	1	3
Palea_steindachneri	Trionychidae	Cryptodira	Tropical	Paleartic	Aquatic	Carnivore	430	22	22	3	8	1	2
Pelochelys_bibroni	Trionychidae	Cryptodira	Tropical	Oriental	Aquatic	Carnivore	1000	30	30	22	100	2	2
Pelodiscus_sinensis	Trionychidae	Cryptodira	Temperate	Paleartic	Aquatic	Carnivore	350	25	25	10	35	1	5
Rafetus_euphraticus	Trionychidae	Cryptodira	Tropical	Paleartic	Aquatic	Carnivore	500	23	23	10	32	1	2
Trionyx_triunguis	Trionychidae	Cryptodira	Tropical	Ethiopian	Aquatic	Carnivore	1200	30	30	25	100	1	1

## Sheet: 3states
species	carapace	eggwidth	egglenght	Character	clutchmax
Acanthochelys_spixii	170	25	27	B	9
Chelodina_oblonga	275	23.5	36.7	B	16
Chelodina_longicollis	178	20.6	37.1	B	23		Test convergency between cryptodirans and pleurodirans that produce clutches containing bellow 5 eggs, from 5 to 29 eggs, and 30 or more eggs.
Chelodina_mccordi	232	21	30	B	16		A: Pleurodira (1-4 eggs)
Chelus_fimbriatus	381	35	36	B	28		B: Pleurodira (5-29 eggs)
Elseya_albagula	400	34.4	57.5	B	16		C: Pleurodira (30 or more eggs)
Elseya_branderhorsti	500	29.8	52.6	C	32		D: Cryptodira (1-4 eggs)
Elseya_dentata	285	30	50	B	12		E: Cryptodira (5-29 eggs)
Elusor_macrurus	378	25	35	B	16		F: Cryptodira (30 or more eggs)
Emydura_macquarii	310	23	33	C	33
Emydura_victoriae	160	22	39	B	18
Hydromedusa_maximiliani	177	25	45.4	A	3
Hydromedusa_tectifera	300	28	36	B	15
Mesoclemmys_dahli	184	29	36	B	6
Mesoclemmys_gibba	230	32	45	B	5
Mesoclemmys_heliostemma	300	41.4	50.8	B	11
Mesoclemmys_raniceps	370	30	40	B	6
Mesoclemmys_vanderhaegei	262	28.5	35	B	14
Myuchelys_bellii	400	21	32	B	23
Phrynops_geoffroanus	350	32	34	B	28
Phrynops_hilarii	400	37	37	C	32
Platemys_platycephala	180	28	51	A	1
Pseudemydura_umbrina	130	20	35	A	4
Rheodytes_leukops	249	21	30	B	13
Rhinemys_rufipes	270	42	47	B	12
Erymnochelys_madagascariensis	480	29.95	47.1	B	29
Peltocephalus_dumerilianus	500	37	55	B	25
Podocnemis_erythrocephala	320	25	43.5	B	18
Podocnemis_expansa	1000	41.48	44.58	C	126
Podocnemis_lewyana	500	44	45	C	40
Podocnemis_sextuberculata	300	27	44	C	39
Podocnemis_unifilis	500	28	41	C	52
Podocnemis_vogli	340	29	48	A	18
Pelomedusa_subrufa	170	22	38	A	15
Pelusios_castanoides	220	22	32	A	25
Actinemys_marmorata	210	23	43	E	13
Chrysemys_picta	125	16	30	D	4
Clemmys_guttata	102	16	29	D	4
Glyptemys_insculpta	185	23	33	E	8
Glyptemys_muhlenbergii	76	15	30	E	6
Deirochelys_reticularia	150	23	37	E	8
Emydoidea_blandingii	190	24	39	E	19
Emys_orbicularis	140	17	30	E	10
Graptemys_barbouri	270	26	36	E	11
Graptemys_geographica	220	22	33	E	20
Graptemys_ouachitensis	240	25	32	E	12
Graptemys_pseudogeographica	205	22	35	E	9
Graptemys_pulchra	270	32	42	E	6
Malaclemys_terrapin	238	26	42	E	18
Pseudemys_concinna	300	27	42	E	18
Pseudemys_rubriventris	400	24	37	E	25
Terrapene_carolina	114	22	38	E	5
Terrapene_coahuila	120	17	33	D	4
Terrapene_nelsoni	145	27	42	D	4
Terrapene_ornata	146	23	31	E	6
Trachemys_dorbigni	260	26	40.7	E	19
Trachemys_scripta	210	26	39	E	18
Trachemys_stejnegeri	240	26	43	E	14
Trachemys_venusta	500	34	47	F	32
Batagur_baska	540	40	76	F	35
Batagur_borneoensis	600	40	72	E	25
Cuora_amboinensis	190	30	52	D	4
Cuora_flavomarginata	180	28	53.5	D	3
Cyclemys_dentata	220	35	57	D	4
Cyclemys_oldhami	240	32	57	D	4
Geoclemys_hamiltonii	350	22	50	E	19
Geoemyda_spengleri	130	18	47	D	2
Hardella_thurjii	530	34	60	E	16
Heosemys_grandis	450	35	65	E	8
Heosemys_spinosa	220	32	60	D	3
Leucocephalon_yuwonoi	300	45	65	D	2
Malayemys_subtrijuga	270	22	44	E	10
Mauremys_japonica	209	22	32	E	8
Mauremys_leprosa	250	20	36	E	13
Mauremys_reevesii	240	23	44	E	9
Mauremys_rivulata	200	22	35	E	12
Melanochelys_trijuga	385	35	48	E	5
Morenia_petersi	220	20	45	E	10
Notochelys_platynota	360	27	56	E	6
Orlitia_borneensis	800	40	80	E	15
Pangshura_smithii	227	23	44	E	9
Pangshura_tecta	240	27	42	E	12
Pangshura_tentoria	271	27	42	E	12
Rhinoclemmys_areolata	207	38.6	71	D	1
Rhinoclemmys_diademata	254	31	56	D	3
Rhinoclemmys_funerea	325	35	68	D	3
Rhinoclemmys_pulcherrima	206	39.8	61.7	D	3
Rhinoclemmys_punctularia	260	37	71	D	4
Sacalia_bealei	182	23.2	45.5	E	6
Siebenrockiella_crassicollis	300	19	45	E	5
Aldabrachelys_gigantea	1220	50	55	E	19
Astrochelys_radiata	430	50	50	E	22
Chelonoidis_carbonarius	512	42	45	E	10
Chelonoidis_chilensis	280	36	46	E	10
Chelonoidis_denticulatus	700	48	48	E	15
Chelonoidis_niger	1110	56.5	59.7	E	17
Stigmochelys_pardalis	700	43	43	E	20
Centrochelys_sulcata	750	41	41	F	31
Chersina_angulata	155	34	39	D	1
Homopus_boulengeri	110	22	38	D	1
Geochelone_elegans	210	35	46	D	4
Gopherus_agassizii	279	38	46	E	15
Gopherus_berlandieri	220	36	50	E	7
Gopherus_flavomarginatus	400	47	47	E	12
Gopherus_polyphemus	241	45	45	E	7
Indotestudo_elongata	290	40	50	E	9
Kinixys_belliana	215	38	48	E	10
Malacochersus_tornieri	177	29	47	D	1
Manouria_emys	600	50	65	F	51
Psammobates_tentorius	145	26	30	D	4
Pyxis_arachnoides	150	10	15	D	1
Testudo_graeca	210	28	33	E	5
Testudo_hermanni	155	24	29.75	D	3
Testudo_horsfieldii	193	34	47	E	7
Testudo_marginata	400	32	38	E	15
Claudius_angustatus	150	18	32	E	6
Kinosternon_alamosae	113	16.5	29.5	E	5
Kinosternon_angustipons	115	22	40	D	2
Kinosternon_baurii	114	19.3	31.8	D	4
Kinosternon_chimalhuaca	130	18.2	36.6	E	5
Kinosternon_creaseri	121	19.1	38.2	D	1
Kinosternon_dunni	160	25	45	D	3
Kinosternon_flavescens	114	16.6	26.9	E	6
Kinosternon_herrerai	160	18	35	E	8
Kinosternon_hirtipes	108	18.6	33.2	E	6
Kinosternon_integrum	196	19.1	35.4	E	12
Kinosternon_leucostomum	208	27	43	E	6
Kinosternon_scorpioides	150	19	35	E	8
Kinosternon_sonoriense	176	19	33	E	12
Kinosternon_subrubrum	89	15	26	D	3
Staurotypus_salvinii	220	20	41	E	10
Staurotypus_triporcatus	305	24	44	E	17
Sternotherus_carinatus	127	18	32	D	4
Sternotherus_minor	100	17	28	D	3
Sternotherus_odoratus	80	15	27	D	4
Sternotherus_depressus	110	16.6	35	D	3
Chelydra_serpentina	258	31	33	F	96
Macrochelys_temminckii	400	32	32	F	30
Caretta_caretta	965	46	46	F	120
Natator_depressus	914	50	50	F	50
Chelonia_mydas	1020	48	48	F	140
Eretmochelys_imbricata	764	36	36	F	112
Lepidochelys_kempii	660	27	28	F	110
Lepidochelys_olivacea	655	40.5	40.5	F	168
Dermochelys_coriacea	1524	55	55	F	100
Platysternon_megacephalum	185	22	37	D	3
Carettochelys_insculpta	385	43	43	E	14
Dermatemys_mawii	650	37	62	E	24
Amyda_cartilaginea	800	33	33	E	6
Apalone_ferox	600	25	25	E	24
Apalone_mutica	360	22	22	F	33
Apalone_spinifera	550	30	30	F	39
Chitra_chitra	1100	30	30	F	110
Cyclanorbis_senegalensis	600	25	45	E	12
Cycloderma_aubryi	500	33	39	F	35
Dogania_subplana	350	31	31	E	7
Lissemys_punctata	229	28	28	E	10
Nilssonia_hurum	600	30	30	F	30
Palea_steindachneri	430	22	22	E	8
Pelochelys_bibroni	1000	30	30	F	100
Pelodiscus_sinensis	350	25	25	F	35
Rafetus_euphraticus	500	23	23	F	32
Trionyx_triunguis	1200	30	30	F	100

## Sheet: Divergent_4.30
species	carapace	eggwidth	egglenght	Character	clutchmax
Acanthochelys_spixii	170	25	27	nostate	9			Test divergency among species that produce small and large clutches (containing bellow 5 and above 30 eggs)
Chelodina_oblonga	275	23.5	36.7	nostate	16			State A: clutch size bigger than 30
Chelodina_longicollis	178	20.6	37.1	nostate	23			State B: clutch size smaller than 5
Chelodina_mccordi	232	21	30	nostate	16
Chelus_fimbriatus	381	35	36	nostate	28
Elseya_albagula	400	34.4	57.5	nostate	16
Elseya_branderhorsti	500	29.8	52.6	A	32
Elseya_dentata	285	30	50	nostate	12
Elusor_macrurus	378	25	35	nostate	16
Emydura_macquarii	310	23	33	A	33
Emydura_victoriae	160	22	39	nostate	18
Hydromedusa_maximiliani	177	25	45.4	B	3
Hydromedusa_tectifera	300	28	36	nostate	15
Mesoclemmys_dahli	184	29	36	nostate	6
Mesoclemmys_gibba	230	32	45	nostate	5
Mesoclemmys_heliostemma	300	41.4	50.8	nostate	11
Mesoclemmys_raniceps	370	30	40	nostate	6
Mesoclemmys_vanderhaegei	262	28.5	35	nostate	14
Myuchelys_bellii	400	21	32	nostate	23
Phrynops_geoffroanus	350	32	34	nostate	28
Phrynops_hilarii	400	37	37	A	32
Platemys_platycephala	180	28	51	B	1
Pseudemydura_umbrina	130	20	35	B	4
Rheodytes_leukops	249	21	30	nostate	13
Rhinemys_rufipes	270	42	47	nostate	12
Erymnochelys_madagascariensis	480	29.95	47.1	nostate	29
Peltocephalus_dumerilianus	500	37	55	nostate	25
Podocnemis_erythrocephala	320	25	43.5	nostate	18
Podocnemis_expansa	1000	41.48	44.58	A	126
Podocnemis_lewyana	500	44	45	A	40
Podocnemis_sextuberculata	300	27	44	A	39
Podocnemis_unifilis	500	28	41	A	52
Podocnemis_vogli	340	29	48	nostate	18
Pelomedusa_subrufa	170	22	38	nostate	15
Pelusios_castanoides	220	22	32	nostate	25
Actinemys_marmorata	210	23	43	nostate	13
Chrysemys_picta	125	16	30	B	4
Clemmys_guttata	102	16	29	B	4
Glyptemys_insculpta	185	23	33	nostate	8
Glyptemys_muhlenbergii	76	15	30	nostate	6
Deirochelys_reticularia	150	23	37	nostate	8
Emydoidea_blandingii	190	24	39	nostate	19
Emys_orbicularis	140	17	30	nostate	10
Graptemys_barbouri	270	26	36	nostate	11
Graptemys_geographica	220	22	33	nostate	20
Graptemys_ouachitensis	240	25	32	nostate	12
Graptemys_pseudogeographica	205	22	35	nostate	9
Graptemys_pulchra	270	32	42	nostate	6
Malaclemys_terrapin	238	26	42	nostate	18
Pseudemys_concinna	300	27	42	nostate	18
Pseudemys_rubriventris	400	24	37	nostate	25
Terrapene_carolina	114	22	38	nostate	5
Terrapene_coahuila	120	17	33	B	4
Terrapene_nelsoni	145	27	42	B	4
Terrapene_ornata	146	23	31	nostate	6
Trachemys_dorbigni	260	26	40.7	nostate	19
Trachemys_scripta	210	26	39	nostate	18
Trachemys_stejnegeri	240	26	43	nostate	14
Trachemys_venusta	500	34	47	A	32
Batagur_baska	540	40	76	A	35
Batagur_borneoensis	600	40	72	nostate	25
Cuora_amboinensis	190	30	52	B	4
Cuora_flavomarginata	180	28	53.5	B	3
Cyclemys_dentata	220	35	57	B	4
Cyclemys_oldhami	240	32	57	B	4
Geoclemys_hamiltonii	350	22	50	nostate	19
Geoemyda_spengleri	130	18	47	B	2
Hardella_thurjii	530	34	60	nostate	16
Heosemys_grandis	450	35	65	nostate	8
Heosemys_spinosa	220	32	60	B	3
Leucocephalon_yuwonoi	300	45	65	B	2
Malayemys_subtrijuga	270	22	44	nostate	10
Mauremys_japonica	209	22	32	nostate	8
Mauremys_leprosa	250	20	36	nostate	13
Mauremys_reevesii	240	23	44	nostate	9
Mauremys_rivulata	200	22	35	nostate	12
Melanochelys_trijuga	385	35	48	nostate	5
Morenia_petersi	220	20	45	nostate	10
Notochelys_platynota	360	27	56	nostate	6
Orlitia_borneensis	800	40	80	nostate	15
Pangshura_smithii	227	23	44	nostate	9
Pangshura_tecta	240	27	42	nostate	12
Pangshura_tentoria	271	27	42	nostate	12
Rhinoclemmys_areolata	207	38.6	71	B	1
Rhinoclemmys_diademata	254	31	56	B	3
Rhinoclemmys_funerea	325	35	68	B	3
Rhinoclemmys_pulcherrima	206	39.8	61.7	B	3
Rhinoclemmys_punctularia	260	37	71	B	4
Sacalia_bealei	182	23.2	45.5	nostate	6
Siebenrockiella_crassicollis	300	19	45	nostate	5
Aldabrachelys_gigantea	1220	50	55	nostate	19
Astrochelys_radiata	430	50	50	nostate	22
Chelonoidis_carbonarius	512	42	45	nostate	10
Chelonoidis_chilensis	280	36	46	nostate	10
Chelonoidis_denticulatus	700	48	48	nostate	15
Chelonoidis_niger	1110	56.5	59.7	nostate	17
Stigmochelys_pardalis	700	43	43	nostate	20
Centrochelys_sulcata	750	41	41	A	31
Chersina_angulata	155	34	39	B	1
Homopus_boulengeri	110	22	38	B	1
Geochelone_elegans	210	35	46	B	4
Gopherus_agassizii	279	38	46	nostate	15
Gopherus_berlandieri	220	36	50	nostate	7
Gopherus_flavomarginatus	400	47	47	nostate	12
Gopherus_polyphemus	241	45	45	nostate	7
Indotestudo_elongata	290	40	50	nostate	9
Kinixys_belliana	215	38	48	nostate	10
Malacochersus_tornieri	177	29	47	B	1
Manouria_emys	600	50	65	A	51
Psammobates_tentorius	145	26	30	B	4
Pyxis_arachnoides	150	10	15	B	1
Testudo_graeca	210	28	33	nostate	5
Testudo_hermanni	155	24	29.75	B	3
Testudo_horsfieldii	193	34	47	nostate	7
Testudo_marginata	400	32	38	nostate	15
Claudius_angustatus	150	18	32	nostate	6
Kinosternon_alamosae	113	16.5	29.5	nostate	5
Kinosternon_angustipons	115	22	40	B	2
Kinosternon_baurii	114	19.3	31.8	B	4
Kinosternon_chimalhuaca	130	18.2	36.6	nostate	5
Kinosternon_creaseri	121	19.1	38.2	B	1
Kinosternon_dunni	160	25	45	B	3
Kinosternon_flavescens	114	16.6	26.9	nostate	6
Kinosternon_herrerai	160	18	35	nostate	8
Kinosternon_hirtipes	108	18.6	33.2	nostate	6
Kinosternon_integrum	196	19.1	35.4	nostate	12
Kinosternon_leucostomum	208	27	43	nostate	6
Kinosternon_scorpioides	150	19	35	nostate	8
Kinosternon_sonoriense	176	19	33	nostate	12
Kinosternon_subrubrum	89	15	26	B	3
Staurotypus_salvinii	220	20	41	nostate	10
Staurotypus_triporcatus	305	24	44	nostate	17
Sternotherus_carinatus	127	18	32	B	4
Sternotherus_minor	100	17	28	B	3
Sternotherus_odoratus	80	15	27	B	4
Sternotherus_depressus	110	16.6	35	B	3
Chelydra_serpentina	258	31	33	A	96
Macrochelys_temminckii	400	32	32	A	30
Caretta_caretta	965	46	46	A	120
Natator_depressus	914	50	50	A	50
Chelonia_mydas	1020	48	48	A	140
Eretmochelys_imbricata	764	36	36	A	112
Lepidochelys_kempii	660	27	28	A	110
Lepidochelys_olivacea	655	40.5	40.5	A	168
Dermochelys_coriacea	1524	55	55	A	100
Platysternon_megacephalum	185	22	37	B	3
Carettochelys_insculpta	385	43	43	nostate	14
Dermatemys_mawii	650	37	62	nostate	24
Amyda_cartilaginea	800	33	33	nostate	6
Apalone_ferox	600	25	25	nostate	24
Apalone_mutica	360	22	22	A	33
Apalone_spinifera	550	30	30	A	39
Chitra_chitra	1100	30	30	A	110
Cyclanorbis_senegalensis	600	25	45	nostate	12
Cycloderma_aubryi	500	33	39	A	35
Dogania_subplana	350	31	31	nostate	7
Lissemys_punctata	229	28	28	nostate	10
Nilssonia_hurum	600	30	30	A	30
Palea_steindachneri	430	22	22	nostate	8
Pelochelys_bibroni	1000	30	30	A	100
Pelodiscus_sinensis	350	25	25	A	35
Rafetus_euphraticus	500	23	23	A	32
Trionyx_triunguis	1200	30	30	A	100

## Sheet: TropicalXTemperate
species	carap	eggwidth	egglenght	clutchmin	clutchmax	Character
Acanthochelys_spixii	170	25	27	1	9	A
Chelodina_oblonga	275	23.5	36.7	9	16	A		Test convergency between species from tropical and temperate areas
Chelodina_longicollis	178	20.6	37.1	6	23	B		A: Tropical
Chelodina_mccordi	232	21	30	7	16	A		B: Temperate
Chelus_fimbriatus	381	35	36	12	28	A
Elseya_albagula	400	34.4	57.5	10	16	A
Elseya_branderhorsti	500	29.8	52.6	15	32	A
Elseya_dentata	285	30	50	8	12	A
Elusor_macrurus	378	25	35	10	16	B
Emydura_macquarii	310	23	33	18	33	B
Emydura_victoriae	160	22	39	6	18	A
Hydromedusa_maximiliani	177	25	45.4	1	3	A
Hydromedusa_tectifera	300	28	36	5	15	A
Mesoclemmys_dahli	184	29	36	1	6	A
Mesoclemmys_gibba	230	32	45	1	5	A
Mesoclemmys_heliostemma	300	41.4	50.8	2	11	A
Mesoclemmys_raniceps	370	30	40	4	6	A
Mesoclemmys_vanderhaegei	262	28.5	35	3	14	A
Myuchelys_bellii	400	21	32	8	23	B
Phrynops_geoffroanus	350	32	34	10	28	A
Phrynops_hilarii	400	37	37	8	32	A
Platemys_platycephala	180	28	51	1	1	A
Pseudemydura_umbrina	130	20	35	4	4	B
Rheodytes_leukops	249	21	30	13	13	A
Rhinemys_rufipes	270	42	47	3	12	A
Erymnochelys_madagascariensis	480	29.95	47.1	6	29	A
Peltocephalus_dumerilianus	500	37	55	3	25	A
Podocnemis_erythrocephala	320	25	43.5	2	18	A
Podocnemis_expansa	1000	41.48	44.58	84	126	A
Podocnemis_lewyana	500	44	45	10	40	A
Podocnemis_sextuberculata	300	27	44	6	39	A
Podocnemis_unifilis	500	28	41	4	52	A
Podocnemis_vogli	340	29	48	7	18	A
Pelomedusa_subrufa	170	22	38	12	15	A
Pelusios_castanoides	220	22	32	5	25	A
Actinemys_marmorata	210	23	43	1	13	B
Chrysemys_picta	125	16	30	4	4	B
Clemmys_guttata	102	16	29	2	4	B
Glyptemys_insculpta	185	23	33	4	8	B
Glyptemys_muhlenbergii	76	15	30	2	6	B
Deirochelys_reticularia	150	23	37	8	8	B
Emydoidea_blandingii	190	24	39	3	19	B
Emys_orbicularis	140	17	30	10	10	B
Graptemys_barbouri	270	26	36	7	11	B
Graptemys_geographica	220	22	33	9	20	B
Graptemys_ouachitensis	240	25	32	12	12	B
Graptemys_pseudogeographica	205	22	35	9	9	B
Graptemys_pulchra	270	32	42	4	6	B
Malaclemys_terrapin	238	26	42	4	18	B
Pseudemys_concinna	300	27	42	18	18	B
Pseudemys_rubriventris	400	24	37	6	25	B
Terrapene_carolina	114	22	38	3	5	B
Terrapene_coahuila	120	17	33	2	4	B
Terrapene_nelsoni	145	27	42	1	4	A
Terrapene_ornata	146	23	31	2	6	B
Trachemys_dorbigni	260	26	40.7	6	19	A
Trachemys_scripta	210	26	39	6	18	A
Trachemys_stejnegeri	240	26	43	3	14	A
Trachemys_venusta	500	34	47	12	32	A
Batagur_baska	540	40	76	15	35	A
Batagur_borneoensis	600	40	72	15	25	A
Cuora_amboinensis	190	30	52	2	4	A
Cuora_flavomarginata	180	28	53.5	1	3	B
Cyclemys_dentata	220	35	57	2	4	A
Cyclemys_oldhami	240	32	57	2	4	A
Geoclemys_hamiltonii	350	22	50	19	19	A
Geoemyda_spengleri	130	18	47	1	2	A
Hardella_thurjii	530	34	60	12	16	A
Heosemys_grandis	450	35	65	4	8	A
Heosemys_spinosa	220	32	60	1	3	A
Leucocephalon_yuwonoi	300	45	65	1	2	A
Malayemys_subtrijuga	270	22	44	3	10	A
Mauremys_japonica	209	22	32	5	8	B
Mauremys_leprosa	250	20	36	3	13	B
Mauremys_reevesii	240	23	44	4	9	B
Mauremys_rivulata	200	22	35	12	12	B
Melanochelys_trijuga	385	35	48	5	5	A
Morenia_petersi	220	20	45	6	10	A
Notochelys_platynota	360	27	56	2	6	A
Orlitia_borneensis	800	40	80	12	15	A
Pangshura_smithii	227	23	44	5	9	A
Pangshura_tecta	240	27	42	3	12	A
Pangshura_tentoria	271	27	42	4	12	A
Rhinoclemmys_areolata	207	38.6	71	1	1	B
Rhinoclemmys_diademata	254	31	56	1	3	A
Rhinoclemmys_funerea	325	35	68	3	3	A
Rhinoclemmys_pulcherrima	206	39.8	61.7	1	3	A
Rhinoclemmys_punctularia	260	37	71	1	4	A
Sacalia_bealei	182	23.2	45.5	1	6	A
Siebenrockiella_crassicollis	300	19	45	2	5	A
Aldabrachelys_gigantea	1220	50	55	5	19	A
Astrochelys_radiata	430	50	50	8	22	A
Chelonoidis_carbonarius	512	42	45	1	10	A
Chelonoidis_chilensis	280	36	46	2	10	B
Chelonoidis_denticulatus	700	48	48	3	15	A
Chelonoidis_niger	1110	56.5	59.7	4	17	A
Stigmochelys_pardalis	700	43	43	15	20	A
Centrochelys_sulcata	750	41	41	13	31	A
Chersina_angulata	155	34	39	1	1	A
Homopus_boulengeri	110	22	38	1	1	A
Geochelone_elegans	210	35	46	2	4	A
Gopherus_agassizii	279	38	46	2	15	B
Gopherus_berlandieri	220	36	50	1	7	B
Gopherus_flavomarginatus	400	47	47	2	12	B
Gopherus_polyphemus	241	45	45	4	7	B
Indotestudo_elongata	290	40	50	5	9	A
Kinixys_belliana	215	38	48	4	10	A
Malacochersus_tornieri	177	29	47	1	1	B
Manouria_emys	600	50	65	35	51	A
Psammobates_tentorius	127	23	30	1	3	B
Pyxis_arachnoides	150	10	15	1	1	B
Testudo_graeca	210	28	33	5	5	B
Testudo_hermanni	155	24	29.75	3	3	B
Testudo_horsfieldii	193	34	47	4	7	B
Testudo_marginata	400	32	38	6	15	B
Claudius_angustatus	150	18	32	1	6	A
Kinosternon_alamosae	113	16.5	29.5	3	5	B
Kinosternon_angustipons	115	22	40	2	2	A
Kinosternon_baurii	114	19.3	31.8	2	4	A
Kinosternon_chimalhuaca	130	18.2	36.6	2	5	A
Kinosternon_creaseri	121	19.1	38.2	1	1	A
Kinosternon_dunni	160	25	45	2	3	A
Kinosternon_flavescens	114	16.6	26.9	3	6	A
Kinosternon_herrerai	160	18	35	2	8	A
Kinosternon_hirtipes	108	18.6	33.2	1	6	A
Kinosternon_integrum	196	19.1	35.4	3	12	B
Kinosternon_leucostomum	208	27	43	1	6	A
Kinosternon_scorpioides	150	19	35	1	8	A
Kinosternon_sonoriense	176	19	33	2	12	A
Kinosternon_subrubrum	89	15	26	3	3	B
Staurotypus_salvinii	220	20	41	6	10	A
Staurotypus_triporcatus	305	24	44	4	17	A
Sternotherus_carinatus	127	18	32	4	4	B
Sternotherus_minor	100	17	28	3	3	B
Sternotherus_odoratus	80	15	27	4	4	B
Sternotherus_depressus	110	16.6	35	1	3	B
Chelydra_serpentina	258	31	33	10	96	B
Macrochelys_temminckii	400	32	32	30	30	B
Caretta_caretta	965	46	46	120	120	A
Natator_depressus	914	50	50	50	50	A
Chelonia_mydas	1020	48	48	140	140	A
Eretmochelys_imbricata	764	36	36	112	112	A
Lepidochelys_kempii	660	27	28	110	110	A
Lepidochelys_olivacea	655	40.5	40.5	30	168	A
Dermochelys_coriacea	1524	55	55	86	100	A
Platysternon_megacephalum	185	22	37	1	3	A
Carettochelys_insculpta	385	43	43	14	14	A
Dermatemys_mawii	650	37	62	10	24	A
Amyda_cartilaginea	800	33	33	3	6	A
Apalone_ferox	600	25	25	4	24	A
Apalone_mutica	360	22	22	3	33	B
Apalone_spinifera	550	30	30	4	39	B
Chitra_chitra	1100	30	30	60	110	A
Cyclanorbis_senegalensis	600	25	45	12	12	A
Cycloderma_aubryi	500	33	39	15	35	A
Dogania_subplana	350	31	31	3	7	A
Lissemys_punctata	229	28	28	10	10	A
Nilssonia_hurum	600	30	30	20	30	A
Palea_steindachneri	430	22	22	3	8	A
Pelochelys_bibroni	1000	30	30	22	100	A
Pelodiscus_sinensis	350	25	25	10	35	B
Rafetus_euphraticus	500	23	23	10	32	A
Trionyx_triunguis	1200	30	30	25	100	A
